# Supplementary material for: An Immunomics Approach to Schistosome Antigen Discovery: Antibody Signatures of Naturally Resistant and Chronically Infected Individuals from Endemic Areas
Source: PLoS Pathog. 2014 Mar 27;10(3):e1004033. doi: 10.1371/journal.ppat.1004033 (PMC3968167; doi:10.1371/journal.ppat.1004033)
Supplement: Table S1 — List of antigens printed with annotation and protein sequences. (XLSX) [file ppat.1004033.s007.xlsx]

## Sheet: Sheet1
ID	ID SchistoDB	E-value	Query Length	Identical	Name	db_xref	protein sequence Pubmed
AF036955.1	SJC_S000635	1e-102	22.11%	100.00%	tetraspanin TE736	GI:2766687	MELTLSQQFWTKLFFLLNSLFGIFGIVLLAFGIKGYDILVKFNIILQGTIPVIFPITIFLGCFLLLSTLIGFIGLWKPKQFIVIMHIAIVFIAVLGEICIASITISSIDQFHSTVNSSLLQAVKGYYSDKLYEEQMDRLQSRYMCCGATSYRDYDKAHSIPPFSCLTGYLVYSRGCAEAINSHLQRYVVALISLCYVFAFIKIIYVFISMILLKRFYFMKNSLI
AF048759.1	SJC_S000414	9e-67	13.24%	100.00%	21.7 kDa antigen	GI:2911508	MASTMEQFITAYLTIYRDGDEVVDKKELIDYCRKEKLDMKMVDTWLSHFDVDKDNRITLEEFCRGLGLKANEMRIERNHIKAVQSGRVPKIPDGVEIIASTMPLPRQVEVTQLYKDLLPKSGGHEADMRKVANDFKIKLEERYERVWQVVLLTGSYWMNFSHEPLQSIQFKVDKNIILAWRTPNN
AF072327.1	SJC_S000154	6e-39	28.96%	87.06%	dynein light chain 1	GI:5305387	MGERKAVIKNADMHEDMQEYAVRTAAAALDKYDIEKDVAAYIKKEFDRQYNPNWHCIVGKHFGSYVTHETQHFIYFYLQDRAFLLFKSG
AF380366.1	SJC_S001823	0.0	23.28%	99.41%	serine protease inhibitor serpin	GI:14211394	MAPKVQDPYANNPSHKAFTRAFLSQSTVDFGEDNFLASPLGVLFTLGILLGSGGAQGKTSYQIAKTMRLKSANFPWNISETQQEMKSLYKELSDSLTMENTTLDGNEVKVVRISTGVFTQETYDVESNFNKSIQNDFGGELLTVDFTNQTNAAQDINKWVNEHSNGLVEEFFTDDIPKDAWMILINIFYFRDYWENPFVPYYTSLENFSVTNNHHLQVPMMSKDEILKYKKFPEDGFEIVSKPMKNTRFSFIILLPLEKWNLNGAIEVLNGNKILSHYVDKLEETSVSLKMPKFTLTKKLQLVGTLKSIGIKNLFDPLKADLSGISSKNNLYVNSFIQTNVMKVNESGIEEASVTSPIIVPISALIPDVNFHVTHPFICFIYDQQLTMPLLAAKVINPML
AY222868.2	SJC_S000433	17	3.14%	100.00%	hypothetical protein	GI:171473794	FDIRIIVIKMYLSTSILLIINLFVHVVIVQSMCNLDNLINCCNTEGKANATTFLINKPKGIKAQNVTDHFKNLCKFRTLYEQQSFITEQYQKLASIDIATLFTTTTTTPKTTRPPTTRTPKTTPKQPTLLTTSKSPSLTES
AY222868.2	SJC_S000433	3e-78	22.75%	99.34%	hypothetical protein	GI:171473794	FDIRIIVIKMYLSTSILLIINLFVHVVIVQSMCNLDNLINCCNTEGKANATTFLINKPKGIKAQNVTDHFKNLCKFRTLYEQQSFITEQYQKLASIDIATLFTTTTTTPKTTRPPTTRTPKTTPKQPTLLTTSKSPSLTES
AY222874.2	SJC_S013136	0.0	35.58%	99.28%	similar to Q24940|CATLL_FASHE Cathepsin L-like proteinase precursor - Fasciola hepatica (Liver fluke)	GI:29840885	MNFIFILLILSKVVCECCVSALETTTLDSLWKIWKRLHDKHYTNRHEEVVRRRNWNENLVKIHLHNLRYDLGVETYEIGLSRFSDVDWNEFRSWYSVGDKLDIPESSYIDEKYDVNNVGWTPDSYDWRHLNIVNEPRDQGSCIGSYAFAVTASTESQYALHTSNHMNLSVQQFIDCTRIYGNMGCHGGYTFTLFIYLQSFGLETEQMYPFTGEDQDCMANSSDVVVQSIGYKFHRHGYETILKWALYNEGPYVISMNIDEKFLHYKSGIYQSDTCTHYNLNQSMLLVGYGYDNDGIDYWIVQNSWGKKWGESGYVKVRRNNWNMCGIASLAFRPILRGF
AY222926.1	SJC_S000557	5e-91	10.53%	100.00%	hypothetical protein with IG domain	GI:29840937	MKVVIALLPFLLTLVNARIDCGSIVKLEVNFDDVHSHGITYKKATVKKSIPVSVVYNVVSGEKPIEIESIDWMHDNVPIKIGDSDSQDIYYSTEEASSGVTVTLHIKMPTSRVAGTWTLTVNTKTNTKHVGLCYVSSPPVIRSRFGAVRGHEGSPLSVLCEVDGFPEADEVSWQRLVENDDESNKNKLVPVTNAVFKQHGKTKNGIMEWSDASKSTGFYLCTARSSLGSDNLLLEVRIKSKLAPLWPFIGIIVELLVLGIIILIYERTQAKRRRDEERATLIKQNPKSDRC
AY222951.2	SJC_S000987	1e-174	36.52%	100.00%	similar to Q6MGD0|CUTA_RAT Protein CutA precursor - Rattus norvegicus (Rat)	GI:29840962	MWNYIYNLFIGLFISSLGNGFWFSKTSMHSVVLITCPNSSVAETIADTLVSRKLAACVNIIPSIKSVYVWEGKVERSDELLLMAKTQSKLIPSLTEVVKDMHPYECPEIIGLNIEGGYPPYLKWITDSTS
AY223001.2	SJC_S000042	0.0	66.29%	99.87%	similar to Q5FWN8|DNJ6A_XENLA DnaJ homolog subfamily B member 6-A - Xenopus laevis (African clawed frog)	GI:29841011	MAQTCYYEILGVHKTASGDDIKKAYRRLALKWHPDKNPDKKEEAERQFKLISEAYEILSDPKKRNIYDRRGRGPHADEAFVFEGSDPFSMFTQFHFRDPMDIFREVFGGSGLDAFFGPSIHDLHFGPQLGRAHRSNSHRNAGRQSGSPYHHAQSGRSNQMQSYDSMLASPFMGGIFDSPFGGSLFDPLMAFNSGFGNPQGTSSTSIFSSFGGSPSVGGFRSVSTSSKYVNGKMVRVTKVVENGTETVTEEVDGQVTNRTVRQCGNGALQAM
AY223099.2	SJC_S001206	0.0	27.98%	99.59%	similar to Q9Y6X9|MORC2_HUMAN MORC family CW-type zinc finger protein 2 - Homo sapiens (Human)	GI:29841108	MGTSQIHEKNSSKTTTITVTDEVNGKRTATGKDKSPARDPVTMHHRNRNLTGRDNGDAASVTNKSQNKNDDSIGNKSIELDSTTNSLSTEANTAISKKIQEKFKICLRYFLPPEWPMEKDQIHTLTDSDLASFPLEDFFDRYEQGLRSLLATFQQETKMCTDRLTELRFSVCELLKKYDPNFTEPLSDVEDVDNYIRNFLNKG
AY223425.1	SJC_S000063	1e-104	13.50%	99.00%	hypothetical protein with C2 domain,HECT domain (ubiquitin-protein ligase, domain present in Hsp70 regulator and WW / rsp5 / WWP domain	GI:29841429	MNSKEPLPPGWEMRYDEKSGQFYFVDHNTRSTQWEHPLANQEYSPKANENNSSNLPKEDLGNVCTSSCESIITDVISKARSLQPEIDRFDGTPHSKEFKCLMENLEQLILSLDNLETDGNVEFRTMRRDAVKEIQQLMEMLDYRSLISSQNDEVLAD
AY223437.1	SJC_S000124	0.0	25.32%	99.52%	hypothetical protein XP_072554 in Homo sapiens; similar to XM_072554 hypothetical protein XP_072554 in Homo sapiens	GI:29841441	MYLGYMGFCPQFKYRYGHTFGKETAGIAKDLPYYFGPHSQKPYQFYSTDYDDISRRMLPKSTGDNKYTEGMIPGYSGDVPHMNFKYGGTYRSLSDECVDQLVREYKCAEMKQNKLKEAACQFPKLHPLEKDPLVKNHLNTWTDDMIRMNSAFNTIRSPTEAPIPGYKGFIPRMDTTETGLAKRYHEAAQSSLETFRSECKNHFDNMDMPMTRLNTSSQQFSTMPITPNSKYYSARIFRQEGMIPDYEGHIHGYKYHVGKNFGNTTRDLEVCAHPYSSYGEYTKIRDSSLS
AY223465.1	SJC_S000232	0.0	37.87%	99.60%	hypothetical protein	GI:29841468	MGAAYTKVLNNLLIVDHGEATSDSNLKKAKVACVLSSTQKPTKPTAYWKYFELKNIKEESRCSNLKAGSRFIHECRCSRENIAVVLDSNNHESAVFIVTYFTILSGLPVKLARKAVMKCREKLDITDEYDSLIESMQQSVSAKELREELFTGTSGYTDDRLIEDLRKIYQLAELDPPTSSEIQLETRRGSVKHESTTQKPLNQLFKRLSIDTTGEDEPDKENNANLSLPNVRSKAPDIVIHEYEEETTKKDSLDSSIKSPLSSTSATTTATHSLPDHNNTVFNNIQHDSNEINKGNKTENGTIPTSYEHSNKQTVITTDIKSIDKLHTDINSTQSTNIISQMNTESFTNNHKIMNDNDSMNMSKKKSSKVSISYAPSRESTEVDSVDEYLRSTSVEERE…
AY223469.1	SJC_S000717	0.0	28.07%	99.74%	similar to GenBank Accession Number AB063189 annexin B13a in Bombyx mori	GI:29841472	MAGNLGFNVGSCDSHFCPTLLPASNFNPEDDCERLRTAMAGLGTNEKELIEVLGHRSADQRAIIAQKYKSLFGKDLITKLKSEISGHFYDTMEALCCSPAEFDARELHRAMKGAGTDESVLIEILCTRTNHQIRQIKEAYGRLFSGHDLEGDIIGDTSGDFKHLCIALLQAGRDESTQVDAQRVRKDAEALYEAGEKKWGTDESKFIQVFASRSHAHLRALCQEYNNVGKKTLEDALKSEMHGHTLQSFLTLVQCANNKALYFAEKLKQSMKGAGTNDRMLIRIIVSRCEIDLGLIKKEFHKLTGDSLESWIEGDTSGDYRRLLLALVHA
AY226984.2	SJC_S000025	0.0	25.57%	100.00%	cathepsin B endopeptidase	GI:30995341	MYWYNYYLLLCYIIILLICTLNENDARRHKRMHQPLSKELIHFINYEANTTWKAGPTRRFKTVSDIRRMLGALPDPNGEQLETLCTGYELTLNELPKSFDARKEWTHCPSISEIRDQSSCGSCWAFGAVEAMSDRICIESKGKYKPFLSAENLVSCCSSCGMGCNGGFPHSAWLYWKNQGIVTGDLYNTTNGCQPYEFPPCEHHTLGPLPVCDGDVETPPCKRTCQAGYNVSYENDKWYGKVVYRVKSNQEAIMKELMQHGPVEVDFEVYADFPNYKSGVYQHVSGALLGGHAVRLLGWGEENNVPYWLIANSWNTDWGDNGYFKIIRGKNECGIESDVNAGIPKIKK
AY533028.1	SJC_S000014	20	2.70%	100.00%	neuropeptide F prepropeptide	GI:45271120	MHCHGYRQFSSKWNVKLMNSMINILLILLIRCVLFQSNIILCNAIELSSNSNLNGPDEQQRAQALAKLMTLFYTSDAFNKYMENLDAYYMLRGRPRFGKRNSYHRENNYDGVMQNHLLNSLLRQQLFRKFPTDNLDNDGDENFVIK
AY808337.1	SJC_S000078	1e-143	29.71%	100.00%	similar to SNaK1	GI:76152537	MASDLRDMTPAQIDSVLREHPEIVFARTSPQQKLIIVEGCQRQGAIVAVTGDGVNDSPALKKADIGIAMGIAGSDVSKQAADMILLDDNFASIVTGIEEGRLIFDNLKKSIAYTLTSNIPEITPFLVYIVFGLPLPLGTITILCIDLGTDMIPAISLAYEQAETDIMKRMPRDPLNDRLVNGRLISMAYGQLGMIQALGGFFTYFIIMAENGFLPKRLLGIRKEWDSKSVNSLADSYGQEWNYEQRKRLEYT
AY808379.1	SJC_S000131	0.0	80.99%	100.00%	hypothetical protein	GI:76152582	MASCNTNGLLKYYADVILNGDNLISLSQPFNISDNDDSSERKYNCIMAPRTDLSFASMPVQVDGTSDVIKNECIMGNEVEQSVSNQQVSPDVSQNCLATDSETLTSNPLVGHTPTKLQNHNPCDKFADYEKTLQNHALLTQRLSVCSQRLFHNRTRALSLLTRLLACNTSVSQDGLLPIDSLPSIISPNMTYEDTESSTDDEADAKEALSSSKQSLGVHPFCNTFQLAWVVHGIKHAV
AY808393.1	SJC_S000192	1e-127	21.90%	100.00%	hypothetical protein	GI:76152597	TPAVLVSPEAGRLVSGVHSPQFECLLKAAEEFDKIDRRLSIKASHLDSISYCSTESPSINSNITNEGSTQESVNGSISGSCANKPTTKSTKTISIDNVKSISEGAPTASDSSNESCHPFPITPTGKFDQASKPCELTIILSPKSNKSSAVAKNLDKKSVLVDSSDNSKPMESYDKVATNEVFSRKSSDQVISRRKKSKRYSRNENLHIKSIGIPTLNLCVTSPNSSCQIERNEKFDQVKYVLNKRVEALKSRRKNAEELLALSKNLELEEVEVVRLEREALNAIQVKRSALRASHFQLSNDYESEKCSKSSHYSKNSDFRQRRSNSHSPVYVQHSNYSHYSDELSVEEP
AY808459.1	SJC_S001391	3e-81	20.21%	100.00%	hypothetical protein	GI:76152664	LLSFSTEDTIRSQYNQTNNLKTINRYDTIVDITTEIDISSNLIQLIIGLVGISIAFNIFFFARCFAVRNYLKNLHIGHSRNYCLDQLLCIDQPRKLSLNTTRINHIQHINSLETPKIVKKSSTTLEQTITTTTMLNEQQWCESINVMPMIHYNTSPFIYQKSSISMPQSPIMSHPTIHQYQSDYLQEPNIQQQQQQQSTYYSKYPTLHNSIGNHNASSMEFIYDEVHNSVYTTLNNQSSDYEKNKEMMFQKR
AY808494.1	SJC_S000040	1e-146	44.03%	98.90%	hypothetical protein	GI:76152701	MLSSNIRHPKEVTVRVYKAENVRVAPRSDHKQKKVSQKWKCVILGGKKNISSESVYAPNGNPVWNFETTFKIANRGDPVVILVSDSEDNHAGQVVVPGVTIPPRPTDPSVVLTDNSRLCVVELEQTKKTEIGFGRLYFWIWVEEYRKEESKTRGTKGSILSLHHHKDKGSIPNSLNYSGSVISLSSNNDEYKKKKKWYKKSENHT
AY808531.1	SJC_S000058	0.29	3.13%	95.65%	hypothetical protein	GI:76152739	VAEATDDDLIEFVAPRLSKLISPWDHLLLRSEHGSPPLPQVPRVVLDYLSLVERARSFLCDQLELRLTKKSKISNESNSENCRDGDDKDMSKSTLDSKEGESNVQSKGKFSSQSNGGVHDDDNVDAEDEEDEDDDDDGAIIIKVDTGEQSAALGLPCGKYVVKEPLREEYLPRRFRSILAAQRANAAAAAAGSDSEKKV
AY808650.1	SJC_S000682	0.0	43.57%	99.07%	hypothetical protein	GI:76152863	MKSKRSTSKIRNSEPIDDILRHVGTKQYLFLETHICTIYRVTCSPGESFSESKALSLVEKYHRKRQSHCNAGLLEDRFSLERTKTTGKIPFRPWVSYKEIMHMYVSHTRPEYFVLCIDSQRSLQKYYEIYKCKSAANTRKVEELMRRAMNDPDKKLHDVSALRQVAVKDSDRVRSLPNFEEENIRDTMVEDTSPSPPYHYPSPPPVCQLPSPVMVSPVKQVPVYNALSPSPGPLNFETYNVDDLENVTYIKLDPNKGPMIDKEGPIYMFFSRQKNNLTEPSTLNNYVNHNT
AY808749.1	SJC_S000708	1e-165	41.53%	100.00%	hypothetical protein	GI:76152968	KIEAEDSIEPEMFIEFPSIKEETLAFCEFVKNLDGSPDDNPEPTTLASLFAGTHEAQPPVSTPINVVELINLPYELRNSVKEPPKLLRDKQSLTDSTSIPRVTKSNAARKQEKNFERFHYGAWYIPPKQWKVIRSDNVNKLNNKNEINDVKMKSYKELMENLNDQMKETHGYNAFMEFLQNKNKQVPKFMKF
AY808751.1	SJC_S000682	9e-57	17.57%	98.39%	unknown	GI:60596181	IIQSSIQLSFNRLHSFSHIYIIYIYIYIKPPNTIRYSNLTKDKQ-NQNVRLVKYVILNQLTIYYVMLELSNISFWKHIFVQFIE-HVHLENHLVNRKHYH-WRNIIVKDNHIVMLVYWRIDLVWSARKQLEKSRFVHGCHIKKLCICM-VIPDQNTLYCASIHNEVYKNIMKYTNVRVQQILEKLKN--DEQ-MIQTKNYMMLVH-DKWQ-KIVTEFVRCQTLKKKNT-YYG
AY808756.1	SJC_S000007	0.0	47.29%	100.00%	hypothetical protein	GI:76152975	QKQKEAELKARLKQHQLHMEAKKRQRLGLPPLKNEQNSKTETFRSRSQSRNRNVKANPSKQEKNPITDVNNLTIKSKTASAKLGEVHPNDVEAMIKLMQRLCTEAKCKLLADSDCLSLSNSKCPKCKRAYCFMHRPIGKHISCPVNSEWNTTEGDAVSIACGWDLDEKKEALKLALRERKAKLRELRERC
AY808785.1	SJC_S002287	0.0	54.53%	99.77%	hypothetical protein	GI:76153003	NPDDLKTLINYIDSERTNKITYKMLASRIYFFRINVGEQLRIKATELSKHKLDQHRLFVRPEGPDILDKPPKGFPSKMKTTNSNSKSIQVSKMSRGKGITYTNKTSKDSLNGHENIRPKASYSDTKNNNSSTIYTEENKPFCTSTITELSNFYSDEFFKHKKELNNKGKPGKYKPLDMPKCKDLSEIPNQTTISTKPHILPITEVFDKKYFQDFPYL
AY808797.1	SJC_S000529	0.0	77.07%	100.00%	hypothetical protein	GI:76153016	MNTLLLCFRYFINEWKLLRFQMVFGRHDCEMVGESGYQLRNLSNNRCKRSIESVCNPNTCVREAKRVRRSDSTSSHKENNGLSTVLNDMSCRSRAPPLRSIHPMNTINESTAVSSTPVRRLKVPGNLSETTTRLTRSCSVKTSPIIVQRRTLRSSRRRSIQTVPKAVLQVKLERFSVQSYSGTQSEEVVDSCNSSLENESQTELKAVEDPLSSWFSPRRFSSIGKDQAAKLKRLNRRRMEFDLQELSQSFGYDPCCVSSDSLLNQSMVGDPLE
AY808827.1	SJC_S000004	0.0	92.24%	97.61%	hypothetical protein	GI:76153049	MEFREVLALAKKKQSRHDNEVKRIEEHAKQREIEKKKQMEIADELSRKYTKHATVTNNNVNISNLGAFSSPTTLPTVKASTVRSETFSSNSSSVCKSNITAIHKVTDHEKVVKLPNRSLESPIVPCSVKRAKVPPKPSRLSFTDMMELAKKNVQHSPDRKRPFDDLIPCSVDSKYRKLDSSSTEGLRTPLVTPKITKKPKLSSKTKVPESLKVTPNLQSKISISGGTNGFCKTANRSVIEKAVQHLEKPIKFSTCLKKERSNHTRVNLPT
AY808893.1	SJC_S000008	0.0	96.83%	99.54%	hypothetical protein	GI:76153120	SPKYFHQNAPIITSSTGLVTSEATTPTSGAPFGRRLSEIIKETHPSQKCQNNNNCVPVKSINEAISSNEIIHHYLNTQNSHFNHSDVIYSNAQSESIQTNSSYDTVRPINIPPSRLKSNFLLSRPSLPLQANVNDSQAPQIHCPRQHSCDENYSRSAFECRKSSLNEPSLFSGDNNNNVGERSSPPRLTPSPIIFSSSVSDRSDNNSSAIPPRGMDNHEDVIVSPIIAPSTTTSSNNSDGDISQKKDETHSRLTSPTGSFLLLPPPVPWNLDVSQEVVNETTPSLFVDNSNNIILKNNHYVNNISDSHRRCQSKDSLLSDDINFLNSPCSGHHHNHENKPLGLSPTHHLDFDSFGISEMTDSNTYAFSTLDSDCLAW
AY808899.1	SJC_S015464	1e-136	42.07%	95.08%	hypothetical protein	GI:76153127	MSSLEASQILASALKDVDEILKVSNCESNDICNAYDNPNNQYTLPEKSVQNVQRQSHSINVDNSTTCDETGHYRTEKEFFTLMNRLHKCIEKLHLSPDITPLHTPEYYPSNFRVTENGHFNLVEPTITQPTDCNLINNKQLQLQQQQPQHIVLSNDYTNLNDKLLHQRIIRLQAQIQAQANRIAEMKMDKTPSSHLVNRTNRTDQNDTMNQFTIDMDNRQLLNE
AY808903.1	SJC_S001241	0.0	53.92%	99.70%	hypothetical protein	GI:76153131	CLHHLHPQATSDNTAPVVSVNNHLASEVVAIAAASLPPLQPASRFRKARIHETVEQWSYGRFSVHDCHLKTVPDWVSELQKKSFVCEKAVATLANRRIKCMSCLIPKGTHDKESALFPRSTTDSTHVSVTTDSYSEHPHKKVDILENELEDRPFILSNGFSGANLFYFWNDGLRIHSQVPFTTVHTRSSEPTYDSCGEV
AY808953.1	SJC_S000336	0.0	92.15%	98.30%	hypothetical protein	GI:76153187	MTDVHHRSLKWSAWRSNNSKVYNCQSRYKYVKKIPPSCCVPVSSLKWNKYTCPRKGELASSACASSLKRDPSGMHSYPNKIQSYISNSERFRLYKFDRKLSKSLISCCGATQPTDKMCSIKLPSDRINRPSDRHAHIPHYSSRIVCSKRSQFRYVKPSSSAISSSAIKDDLKIITKFSIRKVKQHNMPRPSAALYKKIVRRAVCSLKF
AY809019.1	SJC_S002065	1e-131	35.10%	99.18%	hypothetical protein	GI:76153263	MSDCERDCVRILPNNQSTELPHLKLDSSQIDDSINTEKISKAFSPPKNRLTPLFGKKLFMHCESGTARDKQMEHVLKKLKGVQTSNDSSITSTQSSQLSSMSGILGCSQRMNLNNDLLFKARQLGIKILTTDTVTKWIKNLPSDVQSYIQSVHQADHDDHFIQLTSDPERDRIHEVRHLVT
AY809028.1	SJC_S002506	1e-154	52.68%	100.00%	hypothetical protein	GI:76153273	MPCFCLCFWRCFKNKLIAKNAKILKEILYRISNADNLNNEQINYIIQKIYLAILNEESTILLKNLESSIKNSHLDEFHCNIRIYNQHSDTVKRHTEAAAVSQSSNNNIFRFSKHKFPEKDHGLTKSQLQLILRMEGVRDWLNLVASCGLLNELDPPLPIIPSVEKYIRIGSWN
AY809115.1	SJC_S000982	9e-57	17.54%	98.33%	hypothetical protein	GI:76153372	MPSPTSEADKSSNVGVVDEVHSNRKLINGNEIELLKKNLPHVDFETGLKHRVVQRDPITGLGTLPKEHIEFGRTRNSSTGRPGLNTTLISWDVDSATICKNNGHTTKKSKQPARNPIA
AY809178.1	SJC_S000081	1e-172	34.98%	100.00%	hypothetical protein	GI:76153440	PSYLNASLAAFGYSKYYSASKSVHNLTCRETCCFKVQPSTDLNKISAPSHDGDSNINNETATSALPNLRTMLSDELQTEKRKRGSPGPVLTDFRSSYRHTNSGYKDVLDGDTENVKLRRKRTTSHTHNTDDQEHWNRSSLIMLAVAHASPRGRVVTPTTGLTKPFIPSLSDSISADEEKYKSKTEAITTMQHEIEIADIHYSNIPFESSSTVTNCASEIQSTNTDHISSEPLHRLSIKIDGNFYLKQVDETEKELLNKVSEIDTDLNNEVDLNDEVSGLLRTASGKAKLL
AY809239.1	SJC_S000790	0.0	66.46%	100.00%	hypothetical protein	GI:76153500	ERTHWFEHKHQQQVQSSPNSSSLPRNVESIDEVESWNYQNLSQVPLRQSSDDNISQASTGQNRYGRPKFDSKQETSKFTPYSLQPPVQSRLGPQIIEGELSRVHLSGTGSSVESIRVKKSVSFDKNLETISVYSPPNTPQESFIEHSTLHKTQQSNRTLGQTSGTKTSLNSLSTNSYKKVLSPPVGFEIDDKTNDKTHQPNRTNQNYSVPRSS
AY809244.1	SJC_S000457	0.0	78.89%	98.30%	hypothetical protein	GI:76153505	RKGTVCVLVASSVAARGIDIPNVSAVINVGLPKEVDEYVHRIGRTGRMGQSGDAITLINKVLLKEDKTSRTVSRGICQLFQSGGIIDKVPQLLLEYANRGIEEEKYSPRFQYSNNNKKRKAYSDSKSRSFATDYKNKHSADDTVMHRYS
AY809286.1	SJC_S000682	0.0	77.84%	99.82%	hypothetical protein	GI:76153550	MASSSSLIQNNCSSSTTNSGYGNSTLGRTGSLGYIDEVLRHAGTKQHIILQVHVCAIHRTTVRDTSDFSKETALKYIEKYHKRRRSHCSASLLEDRFCLRRVKQSGKVPFHPWIVYNEIKHIFISSTRPEFFALCIESNQDLQKFIEIYKCKSAEDVKQIESKITQAINDPCKLLRNINL
AY809338.1	SJC_S000032	0.0	30.14%	99.48%	hypothetical protein	GI:76153610	NKWPSANRLISSYTKSKNVLPVGPGFTTDDNLPYIFVTEELFKFSNSISVRCLVSAFGEIYTQRMTSYLNQNYSINQGTHSSIANNNQDSSKLSYYDQSNIRPPGLILDSGLEKYPSNYYSDPQLRILIQWISAALVYSSPCSKFSYLSSKRNLLLNKTNSNDDDTAFNKELKGLKDEISMEHSCSPLICCSNGNSKLKELQTVISLVHNLAWTAKDLFCVIIDYFHYRSERLKLLNSKNDNNNYSPCFNYPNGMSSPDKKSKTLLTLFDYLILRLYNVQ
AY809388.1	SJC_S000270	1e-138	40.55%	100.00%	hypothetical protein	GI:76153661	FTLVICCMELGESQQHTKDPSNPICASKCGQEALQDLLSGLRDLMLLFYACMDPKTRGMSTHQASIAGPQCSEILQQMKSNKELLRQTFHVVKESCDRLLPTDISDLIPYANTSLVNKETSAELKPLIAAREKAIKRLLAVTGELENLRRILTKTVWELNDLTDPSVQKL
AY809406.1	SJC_S004469	0.0	35.71%	98.40%	hypothetical protein	GI:76153679	ASRVHHAVAASLNWIYVVGGESEEGELLNHCSRFSLTDLVWYSMSELDSPRSHHTLICIENYLYIFGGYCLNWSTNYSPASDSILTYDISTNKWSNSHHKLPFGLVDTCTLLLTHKGLVMFAGGLWKVRFNPGGGMKCVHLIVLFCMIRLKKMERISSFCRNSPTPLISVALACDSVEDQVFLCGGRMSMYGSEINDISNKVFSFKFSTNCWTQVTVLDFPRYSAFSFVLYDKLYVIGGITVDEVIENTSSSLLASLINIDSDDSLANRQQTLTTDTVRNITSNLLEQFSFGDYIRPNILQAPFRPCHFTEGWQLRSSQSSSIMLASTSSDNFYTSSTQSRPKRLKLSLARYNNHLPVITRCYAVYCIAPYLNCIK
AY809526.1	SJC_S000091	0.0	55.68%	99.74%	hypothetical protein	GI:76153824	LSDCLPFEMEKLRQINMARMASMRKYTNNTIVDKSETSSEHTTTPTKISVSDNDGNDSLGVIERQKLDAMWGPKQDCIMTTWSGWSPCSVSCPNQTGMQMRWRYIEKPAMHGGKFMWHTF
AY809550.1	SJC_S000133	0.0	42.36%	99.42%	hypothetical protein	GI:76153856	DKQYHTASRTDQTSSEIQVVNTLRKQSVYDNSASSTTIPVGSCNSPACIAVRNLLKALQERYSDLMNQYTQIKQYPVLTNGHVDNINHDNNSIVLRKSSQTPAFIEELYTQLTNLSLLLNENNHNNKQVVEHYELCEHIKMCMRLVNLLDNWINSCLTQNDMEIAHLRSLVMNLQLRNSTVADQKTTIFTSSMNPIKKDNNNEQNKQIFSCSISVNRKQDLSEFLLNEQELFNLREKLRLAEAQLQLTSMMQTTEVNQL
AY809555.1	SJC_S000306	3e-80	33.81%	97.60%	hypothetical protein	GI:76153863	RLSVVLFFNTGYDSITSLSLSICETFCDLTKKLISFYYDVIISIREGVLAEIFPRLLLAYNATGLLILTGFLVGLSTFLLLRHLKSHGPLRAQTSQVRRGFRRRDKIRYHAIRFGRKFNEITEEVKKVHTKEERKTTIVNFAKKIFKLHDSEKSPTLAYGRVPE
AY809620.1	SJC_S000537	0.0	56.36%	99.42%	hypothetical protein	GI:76153964	FFIVVALTIGVVWKYVLKKRKSQHHDKHGAIVLYHNPQNLGQSNFGSSCPLNQHFMNITYEDTSALPPIITKSSSAAYSKKLEPSPIPDEYDECDPLGIYAGTEIYETSFPPDENVGFDNKNNLSSTAETEAEPFDEDAPPLPNRPTTYDSSPIIMDYDFNQLIDKQRPLSNVSTFTNNFNDSLTYQSNL
AY809768.1	SJC_S000837	1e-123	25.81%	100.00%	hypothetical protein	GI:76154162	MALSTSNHEYSWKDVNLALFGSDEDKRVKKELGLQEEAWLPVLNTNCPRLFVWRVEKFKIRPVNENDYGHFFNGDSYIVLNVYRKNRGLGYDVHFWVGSKSTQDEYSTAAFKTVELDAVLEDQAVQHREVELYESKLFKSYFSSFRILNGGIDSGFRRVTPNEYQPRLLHFHQEGRGHCEVQEVELSLNSLDSTDVFILDLGSKLYQWNGSKSNKEERYSAAQFLQKISSERNGRCKTAVLDEMFTNPNDEFLHYLP
AY809911.1	SJC_S000325	1e-136	8.37%	99.60%	similar to tractin	GI:76154309	LYKRTASAWKDMGLVCWSHLDSSAVYSTYFGGSLERPRLLTYDSNIPFIGNEITVLSPLIQKITVRIGPRTGLKLVTKYRSNPKHTTVRWTKDGKKIPSDFPRHNDYLLKFPDLIHRNHSGMYNLLVENEHNRVNFQFSVSVVGPPEVIRAPPPLILVMEGENVTFSCHLDSFITESLEINGLPYQPNAANFRTELRDQYPYLKDVLIQPLQKNGHILTYSAYNLFFTPGSKIGPTHTVSLVGKNEYGLARVSTVVRVLPRLNILKAPKDYSCTTDCLNTASHIFDCVINTDSYESAYIVQTWELNGIAVSKMTKDYQQSKFLKTEGTKLIITPVDDPSLTVLFRKVNVTCRWRIFYPHVTSRIADLDTRLLEPNMKVYDSHDDVKIHSLMTAAFNLQV…
AY809972.1	SJC_S001460	4e-96	25.43%	100.00%	similar to tropomyosin	GI:76154376	MSSPVIGAVKSKMQGMKLQIDQLKQEVSSKQAVLRKEEENKTKAEAEVASLQKRIRQLEDELESTETRLQEATLKLEEASKAADESDRARRVLEARQTAEDERILQLESMVQETAKSVKDAETKYEEATRKLAVAEVALSHAEDRIEAAESRLKELQSIIHGTMGPVKTLEHQESQAAQREEAYEENIRDLTERLKAAERRVKEASHQEEMKHMELC
AY810129.1	SJC_S003253	1e-179	25.99%	98.25%	similar to surface protein	GI:76154554	QIKVHCQGYPAHSKDHLQWVYIPLNNPQKIIPIVHSNPKDEENEQETEEIMKELNEKEIDETVGLAFQLTDSIPATWPGSTGPQQLVQSSVIEHENQPKQMYSAERLSLSFDSKYAEMVSDGTLVCRYLRPKGIIPIDTDDAAESLSKVNIPELNTNDDSDEVLEKSEISMKELLDAKEGDDTSILTNALNNENDSNEADNIQSDGVRSNTAKQSISTFLYVNLIVLLIIFMKYETF
AY810132.1	SJC_S000090	1e-115	14.33%	98.65%	similar to ZDHHC12 protein	GI:76154557	FQHRRGHVLVTSDSGEKQPVYSSEYDIGANYDKKFTLGQNHSQSESFFQHPDGQFTVEENITVQTQSHKFPMNLINTWSSKLCSKINADCEVLVNLSVPVRFCKRCLLEQPLRCRHCPDCNRCVLKFDHHCPWVSNCIGERNHSVFVVFLFCQTVSIWWCLYYCWYSLVGTSRWDVWFQSNGLFLFFIMILIICGIPVTVILGFHIYLALVNKTTWETVAHDHITYLQSLKSHENPFNQGFLWNCYAFCCSRHPYGWDHIYANSTERYTTSAPTSNIISSNQNKLNNNYDNNSINGPVNLITNNTVMTI
AY810145.1	SJC_S003253	1e-126	33.68%	100.00%	similar to surface protein	GI:76154577	GSENEDMIVATVQLTNGQCNTENDDIVKCTRTIHGQIVHFTLKDPSTSDIYKLYMKSSADAESTTPGVELVTSGSLGETVKEDIKHAGLSLTVEGIHHDEETQETELEVAVHIASKVITDNVACRPTYILLEFSEPQIETLKSKVTSKQTIFRIKLPAKQTEINSEMQLLIGSLDPTLAEASTKESVIFMNPFYIHTDITTDAQNQIIQWFGLPTIFKNLLHHYSV
AY810377.1	SJC_S000114	1e-145	20.27%	100.00%	similar to ENSANGP00000011291	GI:76154863	TLALQGLNIADPRSSNPNLVFFLIIHEATSIFHFFEKTIDESILPMVMSNSSYANEISSKRKELRQDLEIKFCTGLEKCLNLAISRVQYLLSNEQRKTDFRPDTNANSGLITSNPPSLACQHVVGFLTHLNRETHQHLDGQNLKTFLHEFGMKLNRTLVDHFYNFSFSDTGGFVAMQDVTAYREIAKHFESPTVNLVFDILLKLMNLMLIKPENVQQVVQDYLQSGIPKDLLMNFIQLRTDYKTAKLQNVIQLKSTR
AY810537.1	SJC_S000009	0.0	56.82%	99.74%	similar to alkaline phosphatase	GI:76155174	LTSQKALLLFITFILLQYDTECRKSLLNVEDPETWRKLADEKFNKFEKSLYYSLTKRPKNVIIFIGDGMSLNTVTGARYLKAENMDLLGGDVQLVWDDWPVASLVRTFNSDRLTTDSGSAATAFLSGAKGPDGTVGITGTVKCCKCTELRDLERAKSSLKYASNAGLSTGIVTTTRVTHATPAAAYANLLHRDWESNAEISDSGFNCSDAAAQLIANASDIN
AY810680.1	SJC_S000001	1e-108	17.11%	99.03%	similar to ATP-diphosphohydrolase 1	GI:76155306	LTEVTNAVMNFCRKPWKDVAKITKVSDHEFTAKYCFDGLYIINLLKMYGFTTDELWKTITFDSKVNDKSVSWALGYMLDQSGHLPSESPKVSISTKLFIIIFILLFLLMIGSIIGMIVTRCLLSQTKKPTNQV
AY810692.1	SJC_S000332	1e-167	20.26%	100.00%	similar to glucose transport protein	GI:76155316	RRSENALLYFRGHDCDIHSELELLKNETEHSSRRKVNVCDLLRIPHLRWALIVAVVPHIGQQLSGINGILYYFVSLFISNGLTKEIASYANLGTGGTILIGTFVSLFIIDRQGRRPLLMFGILVCLLSLLLFTLTLIIKQVTGINEFTILSIVLTYTFLFGFSMSLGPIPWFLVSELFTQENRDTAVSIAAAINWLCNAIVALIFPQLTIYIGIYAFIPFVCVLLAVLIFIQLYLPETKGKTPAAVEAHFMHLYGFHETEVHENPIFTDI
AY810700.1	SJC_S002531	1e-172	17.65%	100.00%	similar to glucose transport protein	GI:60600091	MGIISIILILIYICSFALGLGPVPALIVSEIFRQGPRGAAYSFTQSVQWLSNLVVLFTYPLIQKAIGGYSFLPFFVIIVICWIFFFLFMPETKNRTFDEVARDLAFGNIVVGKRTTALEDRNLTIFTKQGNTDGPASESLLHSRNDNDKGVYA
AY810705.1	SJC_S002531	0.0	65.58%	99.82%	similar to glucose transport protein	GI:76155326	MGLVEKYGITGSLVLTVLVTCFGSSFLIGYNLGVLNLPRKNIEAYFNKTIVPNTPGLDSNFFYTHVSTIFVIAGAIGAFSCGWIADGLGRRNGLILNNIIGIIGGVIVGPCVLVEQPVLLFIGRFIIGINCGITIGVASIYLTEVAPRDLRGGIGACHQLAVTIGIAFSYFITFSFLLNTSSLWPLAIALGAILAAISLVLLPFCPESPRFLYMKKNKEADARKAFLKLNKKEDVDIFIGELREEIEVGKNQPTFRFILLFTQPDLRMPLLMGTIMQIG
AY810722.1	SJC_S010071	6e-93	16.95%	97.88%	similar to CD63-like protein Sm-TSP-2	GI:76155339	LGCGYKCLQCLLIIFNSGVFICGIGLIVVGALGLHSTVNHWKEIDPPLQSLIIFIIAIGCFLFVLGALGMFGACTKNVCLLTTYCILLSILIIAQIAAGIYAIIEKPKVKRHVTTALKDLVRQYGQDKHLDKVLDEVQEKLQCCGAESPADYSSERPPSCNKYNEGCIGKVTDLTKKHLNATIVTVFIFALLQMICLVFAVCVLMAIKRGDDE
AY810792.1	SJC_S000073	1e-158	87.84%	99.31%	similar to acetylcholinesterase precursor	GI:76155396	MFLLSPINFSIFYSCLQFLPIILWADHIVIRTNYGAVSGKQRYIYGKNVFQFLGIPFAKPPIGDLRFKFPEPPDPWTKILDATKPPNTCMQPLPESQGICRCYNTR
AY811014.1	SJC_S000525	1e-105	39.18%	99.00%	similar to type II serine/threonine kinase a	GI:76155612	MLHHLYSCLTDHMLIFVMFYLIYFTNYAKVDGINCASGFQAHSDGVRSRQCIADVRHCLITLSRESTNEAYNPHSFDCWPWPELENKCPAIGGVCHVLHKSKDDLHKTCCCYGHMCNNESLKIISM
AY811126.1	SJC_S008210	1e-121	25.94%	99.12%	similar to AAP05970 protein	GI:76155736	VHVRQLGAKNNVFTAICALPVNMFNEKIYIFLWLWIAFVTIVTGISLLLWLLRLSIYNQQNQYIRNYLIISIHSQLFDKYFNHQFNCDACNIHVNDTRIDKFIMEFVKNDGFFLLRMIRNNAGDVITGEILNQWWHIFIDYYTALLHKDKSLEQLNDKQYGFINQSDNSIKLNPNSSKLNGNFV
AY811460.1	SJC_S013669	0.0	38.46%	99.83%	similar to AAP06161 protein	GI:76156116	LEKNELSRKILHLESNLHKLKHRTEYPYFRKQPSQTEEPISRYHTQLGDESEYVLSDFGSLDRNHKSYTMISTIDKRQNKISSSVNNQHLNDSDTCTPQKSDTNKVGESVEVLDGKKQSYLFNRNISDSLTENTINISRDIKNEHTLDDDQNIDLSPTIGNDEQIHHQSDHLIQHRSAEKSMDDLSDTLVDLNNLTRHEDMEIEIQPRDSTNNFNRKWSIASDYQYSPIHHSKTLKKDALSTEDDSLRHRSQVQVVIGRSSSNGKKHRTLRASHTHKKYSYRKVYDQPVLPSVFSASSLRFNRHRPASVSGYLDECGLNRSYDLYPGPLSARPSTSFGQLHGSKRYKSLDRGCYTSCQNLSSKPFSTIKMNRPLNRQPLTIHPHSDRRLRELQHMNYLR…
AY811479.2	SJC_S002241	2e-51	15.04%	100.00%	similar to GenBank Accession Number AAP06426 protein	GI:60601822	MCCTIWLLIIPMIVAYTQGHSTVLTAETSSMPYLIKTSDYFERINYLTTRCTDFFRVHHSVRNLCCYLVLFAINDVS
AY811628.1	SJC_S000681	1e-179	31.29%	99.39%	similar to AAH73438 protein	GI:76156305	SKPFHQIVYTYSKCWSLMPADEEWSTIKLAYENVLASKEPNVFPLAPSSLKKFSGLESASKETSDGKLKLVVEMDSNSLKSPAQDNLCEDPNASKMDEGNKSILQAPVEHDGSALSTADQESVSKIANTPEAEDGFESMGPKNISIQGNPNQEGTEKCQKKLHTEINLANMKVSELREQLKARNLPTEGVRAQLLTRLKMAIQEEE
AY811797.1	SJC_S001674	0.0	74.07%	99.35%	hypothetical protein containing DNA-binding SAP domain	GI:76156485	SKPFHQIVYTYSKCWSLMPADEEWSTIKLAYENVLASKEPNVFPLAPSSLKKFSGLESASKETSDGKLKLVVEMDSNSLKSPAQDNLCEDPNASKMDEGNKSILQAPVEHDGSALSTADQESVSKIANTPEAEDGFESMGPKNISIQGNPNQEGTEKCQKKLHTEINLANMKVSELREQLKARNLPTEGVRAQLLTRLKMAIQEEE
AY811902.1	SJC_S000290	0.0	24.76%	100.00%	similar to XP_391949 protein	GI:76156621	FTLVICCMMSLYPSLEELKIQSLIASQSNEPTSLQTNGQAPSVQLPGHYIYSYQQPLPCGSSTNGILPQTGAEQGIHGMPIVPFTPSGALCLPLPSPFDCIDIKPGVRFVNLCKNELGKVGIQLKDIQKGIFVSFVEGFSPAALGGVRFGDQVLEINDVLVTGLTGSRSMEILKNSSPNNIKLALRDRPFERVITVHKDNLGSIGIQIRNGLIKAIVKDSSAARNGILINHQVIEINGQNVVGLKDKDLLQHMEEAKSPLKVTIIPKRFYDKLTRSLPSGQMRLQMDRSHPTA
AY811988.1	SJC_S003598	2e-70	19.94%	100.00%	similar to XP_217452 protein	GI:76156733	MFNINGLFKVSPIQSSFYLIGFHLVVIIQLVRSQSDLDRCAIVCAPDKCQCVGPQGIPGQPGPIGIRGPEGTVGDPGIIGLPGSVGEKGDQGIPGVIGPRGEKGLPGQPGYAGNDGDPGHPGMQGSKGDKGDSGC
AY812037.1	SJC_S014345	0.0	94.23%	98.06%	similar to XP_236956 protein	GI:76156797	FVLILLTLLIYFKTILSSGRILNEINPKVLLISLDGFRYDYIAEAKARNINISAFEKIKNRGIYIESIDNEFPTLTFPSHFSMVTGLHPENHGIVDNIFFDFKLNATFISKNQSGASDSRFYDVGAEPIWVTNQLQGYKSGVAFWIGSEARIKGIRPTHYLAPYNQNFTFNHRVDILMEWFDHKNINLGLMYYHQPDRAGHIYGAGSDEVFKAIEEVNDGLEYLLASINKRPWLKC
AY812161.1	SJC_S000031	1e-112	38.91%	98.19%	similar to EAA15991 protein	GI:76156969	QLLILCLVTVINSENSTDNSTENTIENEIENATETELSEAIENETENVTETELSEAIENETENVTETELPEIIENETKIEALNLPQNPKQKYCKSEGQYCSRTIFHRCCGNLVCQLHGFFNGTCVQCLAERKFCIWSSECCSKRCRLFRCRKNPYVQVIPY
AY812195.1	SJC_S000347	1e-116	36.99%	95.70%	similar to superoxide dismutase precursor (EC 1.15.1.1)	GI:76157019	TTYSYLLVSFILLDSYCSGYGYYYSSHYRKHFDPAIASFTKEPN IGSVWFTQHGNYMYLNGSVSGLPRNSNLGVHIHRYGGLGNMCLEAGPHFNPFNMRHGG RFGKPRHAGDLGNIRVDRYGVMVFDIYVTIEKLGPYDGFIGRSLVIHANMDDLGRNPDEGSRTTGNSGPRLACATIGYRGP
AY812444.1	SJC_S000837	2e-94	22.94%	100.00%	similar to actin-binding and severin family group-like protein	GI:76157395	KPVYKSKKYYESTKCIYKLSDEDGRLSFDLVVKNCLPRRSVNEDDVFFIDTGYHLFVYIGSKCSPCEKQNAVSYAHHYLKNTRHPFIPITVIGPNQSSEELDRAWDKDRTTSYLQ
AY812458.1	SJC_S000165	1e-166	22.46%	99.67%	similar to ribosomal large subunit pseudouridine synthase C like	GI:76157412	MPVLNSFLYFLLLICCSLYTSTLGWILIIMTIYQIFRMPKFTVVAMLFFRFICFKMLSHSFGSPPDRVISSWKLSFLVSNFALAVEIFILRLYVLIVWNIIVLYQLLLKRRDCWTRINDLRVVHEEQGFVVINKHPELLINCTNPWVNCLTLQMQLFYNRPQYVNWKLKNMFHFVHRLDCPTSGLICIAYDTKVASMIRRAFEKREVTKYYLAIVRGYVGSLCDINPSFV
AY812470.1	SJC_S001303	0.0	22.40%	100.00%	hypothetical protein containing Chromogranin/secretogranin domain	GI:76157431	LFFVLSVQRSTSLDTKKQVGESVDEEDDSDRIKAERSCISKKRTFIRDEHGVCRPGELDEDVNLDRNHESRSSVVDRTAAERISYRLVQQRSLDFGLYCQMDRFNIDSCNNEASSSCQLSTNHDDINELHNESLSCIDNELPILHDDVMNDVECIDDTRIHQHEMYVNPRIKEIGKEFTIKDVLGHRVPEFETDSSKDDDSVL
AY812565.1	SJC_S026046	0.0	50.08%	99.70%	hypothetical protein containing Glyceraldehyde 3-phosphate dehydrogenase domain	GI:76157572	FGSSPPASTTMLSDSPKALTTTVPTATNTTCESDSIGSHIPSTPDLKTNSSLSFSVRDTSCLPYSSCNTLRLTIPPGQHTTTCSNSPIQPTHSTPTSPTRSHSNIASFGDKSMTKWLAH
AY812591.1	SJC_S004813	1e-114	14.96%	100.00%	hypothetical protein containing RNA-binding region RNP-1 (RNA recognition motif) domain	GI:76157606	LVTRYGMVSLKRIACDDVASKSTVCKHSKKSKSIDCLSTEVSENGIDFNKSHQTWNFKKGDFKDEMPNHKSKKKLLKNSISELTNGIPKLLITSLPCHMSTT ALKDIFPTVVNLKMRKTAGSKHAVLDFSCNEDYLDAVNRLKSIEFDGVKPNYRAVVGHTENAIQSNLSKQFVNNNPNCLILRNLPYSLTATEIKEHFPLADRIHLDVNKFGIFNGSCILVMKSKEDLEIVLDKCKHKYINNRLVRVNLQSESKLESSKHHDSTNMGYGLKLKEVPNIIEDEHIKALFPQTSLIGLSSRIFQDSNTRNVFIFFKKNSYRKSALKMFKTEVVLGHPISCRLWVYFSKICIPVPSNRRCKSQTAKINMEVNNTVLNNKMPKPNEFSKNEKKLN LYECR…
AY812658.1	SJC_S000307	0.0	52.79%	99.71%	similar to solute carrier family 2 (facilitated glucose transporter), member 13	GI:76157697	MLGIGGIPSFIQLVAFINMPESPRWLVQHGQTQKARVALQRIYGESFVTIQIENEIQRMVEALRDVELSETSQATSDVVQNSNANIDEEDCILPGKTSQFSEDARNRDNGLPSVSESSCLRSKLTLIRMLRLKTTRRALFIGCGLQMFQQFVGINTVMYYSAEILSMAGIGGMNNNKKGENAKIVWLSALVAFANFLFSLGAPWIVNTFKRRLVL
AY812720.1	SJC_S002486	2e-17	6.12%	100.00%	similar to ATS3_HUMAN ADAMTS-3 precursor	GI:76157796	MYCMISWSLLVHETLTIVLFIVLCTNHTNELHLPVENTLQIWPASYQKSNEQKVNLQMVDNHGEQNYWIETLVFADHTVMNRFTNKTMAENYVKTLIRMTDELFHHPSLGVNLSLVIQDIIWVNEAESNELLWGVSLIRSVHRFCNWALTHHYVRYNYDHALFLSRNIVQAAGISPLSQMCRMQYSCT
AY812897.1	SJC_S001153	1e-174	29.97%	99.07%	similar to Sj-Ts4 protein	GI:56752835	MTTFASRLCGYSVVGDTYKAALDLYNWVKKKESVGPIVQTAEDK AISVIKPFVESGIFQKIDDMACQHVLDRAEAACLQIKNTSNERLILPTANRAVTIAEACANLYLPKDDDPKFAAGGDATPTERLVRLQHRTSTHAVTLIHSTVDHANSLLSTLATYGSNLNQTVSNSVIKNTLTQAIALYELAYSTAKAVSLPIAARCLSIILDHVRKLDDQIKESKGINWMDLKKIVTLLEHMKGRLNGQEAVTEIELVPITEKPISSLVSGGKNKSDKSVDSS
AY812951.1	SJC_S003828	0.0	18.76%	99.44%	similar to AAP05908 protein	GI:56752943	MNSLNIYFISFIYITILFIHYTKQSSEYHNNDNNNNDTNKEFNDHEERSFDQIINDFENNDHIEHQHRHPHHHHQRYHSHYIHKNIGKKSLPKMFPWSFRFTRPKSQEIYVFNTERYSNWSDWKECLPMECIEIRYRKCLDDSWKTLSPNPIHTTRCISKYYAEKRTCSNKTQCNAYTGDQIIKNLTNTCGIRKLENEIQTKILGGKVVEPHSWPWAVRLSVKLPRRKSVTFCGGTLIAPQWILTAAHCVLVENKHIPVGKPVILADHMKSTIYAHLGDHDRYKQEPSQMDYRVTVAILHPNYHRKLQTDGYDIALLRISEPVKTKPEIDFACLPPKNLNLPPNTKCYAVGWGSNKGAKVPTFDNIHSILESLFLPFPTLFSSTFMPSFGRRDINLWNL…
AY812972.1	SJC_S001311	1e-113	13.81%	100.00%	hypothetical protein	GI:56752985	MDGAARHAQRLAGNFLEDMEAIQKASRERDRRAMSHFETNSIENSLPRVIHTSYSRNFPLHTSRLGSVPPSTVGTYRSTITSSDYGLPPVVHRSYRTNRYIYETPYYTTTYSNVEPIRTTYTSIGPRHYTYYYPPTVTTRPLSNSGSYSNLSSDMQAERRRIENGSSNHGYGKGLVYPEGSQTSELRGRIKRLLCRSRRDPHYYRYLPTGVA
AY812976.1	SJC_S002622	1e-100	17.31%	99.47%	similar to tetraspanin TE736	GI:56752993	MLKLNISEELWKKIYIVVNSLFIVFSLIMLAIGATALDTLLKYDTIIQITPPAIYGTVIFTSILGIITAIIGFIGLWKKLNIIAIAHMSCLGITLLINICIAIAAAATQDNYNASVQESLTNTIKSYRQSQYQEEFDQLHTSFYCCGATSYKDFATHSMKIPPSCRVGDLTYATGCIEEVVGFAQYQTSVLIGLCFVSALLQGAYLGVLLWMLRKSDNDIGISA
AY812977.1	SJC_S000635	1e-131	20.73%	100.00%	similar to tetraspanin TE736	GI:56752995	MESIKSFNVNVNYMEEFNRLQQHFECCGALSYLDYNRQVSDLPSTCKVKTLVYAQGCVQAIIEYIHPYIITIITFCLIFGFIKIVYLLLSMLMFRKSIGGKDPYTLECCTKRKAPQEVVVSPQYSTENGNVNIL
AY812989.1	SJC_S003866	3e-61	8.41%	100.00%	similar to AAP06415 protein	GI:56753019	MISHQAGPSITYPDRISAESDAEQLHNACKGLSTDEETITKILGHRSQYQRHQIREAFQRRYRKDLVHVLCGATKGDYHSLIKTLFRGKLQILAYDLYKGIKKPEIINEIICCCNNKEIEKLKIAYEEVLREEDPKKASQRTLETDIIKETKPPYEQLLVALLKANRDEDSPELVDEAIRTRNTSRLVNRIQVDKDVEELYYAGEKRAGKGDADTFIRILTKRSQYHVKEIMDVYYSRYDHTLVDAVKNKFSEPFRTGLNTMIMALKDLRLLLVCQLYDSMYGLGTREDTLIRIVCLRCEVDMNTLKSMYREYFGKPLIEAVREDTSGDFRKLLLALMGE
AY813046.1	SJC_S000690	3e-83	37.83%	99.38%	similar to putative enhancer of rudimentary	GI:56753137	MPHTILLVQPSVKKPDTRTWSDYETVEQCLEGVCKIYEEQLKREKPNAPTITYDISQLFQFIDQLADLSCLVFHEPTYTYVPHHKNWIKEQVYVLLRNQAGQ
AY813104.1	SJC_S000717	0.0	30.66%	98.94%	similar to AAP06504 protein	GI:56753253	MEALCCSPAEFDARELHRAMKGAGTDESVLIEILCTRTNHQIRPIKEAYGKVFSGHDLERGIIGDTSGDFKHLCIALVQAGRDESTQVDAQRVRKDAEALYEAGKKNGEPMNQNSFKSLPHGLMLIGERYVKNPIMWGKNFRNALKSEMEGETLQSFLTHGQCANNKALYFAEKLKQSMKGAGTNDRMLIRIIVSRCEIDLGLIKKEFHKLTGDSLESWIEGDTSGDYRRLLLALVHA
AY813118.1	SJC_S007749	0.0	50.90%	99.58%	similar to AAH70543 protein	GI:56753293	MVTCEEKYVARQHVMADRLRLTSSPLLRACLGEFIGSVILLIFGSGVLAQVFLGDHGKHAHGTFISVSLGWGFAVYMGVFFSGQCGSGHINPAVTLASAIVGKLPFRRVPFYTFVQLLGAFLGSLVVFAVYREKILEYARLHDHDKLLLNSTGGIFVTNPSASHLTCFLDQILGTALLTAGAFAIIDRNGWNLPDHLHPLHLAFLVYALVGCFALNAGAALNPARDLGPRLMIFLFGWGSQAFSGANYFFWIPIVGPYIGAIIGGVLYELTIGIHLDRKSDFVVDVDYDETRSDGNKLMAYSSP
AY813185.1	SJC_S000157	0.0	18.89%	100.00%	imilar to heat shock 70kDa protein 9B precursor	GI:56753427	MSRNLLLGQGMMKFFRLRQLCSFYSSGPKGHVVGIDLGTTNSCVAVMEGKQPKVLENSEGSRTTPSVVAFTSDGERLVGAPAKRQAVTNSSNTFSATKRLIGRRFNDPEVQKDMKNAAFKIIKASNGDAWLEAHGKAYSPSQIGAFVLIKMKETAESYLGSKVKNVVITVPAYFNDSQRQATKDAGKIAGMEVLRVINEPTAAALAYGLDRTDDKTIAVYDLGGGTFDISVLEIQKGVFEVKSTNGDTFLGGEDFDNELLRFLVKEFQREQGIDVTKDPMALQRVKEAAEKAKIELSSSLQTDINLPYLTMDKAGPKHMHLKLTRAKLEHLVEPLIKRTIDPCNKALKDAEVKASDIGEIILVGGMTRMPKVQETVEKIFGKTPSKSVNPDEAVAMGAA…
AY813221.1	SJC_S001023	1e-173	23.30%	100.00%	similar to collagen II A1	GI:56753499	MSEGYYKFEDTPRVRRSISDALYNNQHYSKQDPDESITPNTLPSVGAVLRRIYARIENLEASMNSFERPMGTQQNPARHCRDIFEAAEFPETFKSGIYWIDPNLGSPTDAFTVECRFQNKGNVAETCIKPSEDTKTQPLTNFVKTNNSEDWWISHLKQQKQNGTIHKTQLYYAPTNQIRYLQLLHSKAEQVITFTCRNTPVYFDVKNQNYRNAVVVKLFDENVIDTYEDRRTRAIGGSILLDIKVKDECMERSKQKASSVFEFVARKPNLLPLVDIQLKEFGESDQEIGYYMDAVCFS
AY813229.1	SJC_S004000	3e-96	26.69%	100.00%	similar to plasma membrane calcium ATPase	GI:56753515	MRERCSTGDDHTSSESFGCSMRELQALMQLRGAEAVEVLNKRFGGATGLCKRLKTSPTEGLLSNDLAKRREVFGTNVIPPTPPKSFFQLMWEALQDVTLIVLMAAAGVSLLLALYSKYFGGEHNPSDETEGEVSWIERCSYTLCGCSCSFSYCNK
AY813275.1	SJC_S000000	1e-90	18.33%	99.42%	similar to AAP06097 protein	GI:56753609	MIDKQLNREALDEHNRLRALHGCPPLQYDERLARDAQSWAENLARLKILKHSICDEYGENLATSMSTNKATMSGSQATQNWYNEIHQHNFDQQYQSGTGHFTQVIWKSTTKAGFGIQHSTDGHHVFIVGRYVPAGNVQGKFKENVPRPNSRRVSTPKSKVSSQNRDTSNVNGPQRNNRDRIIVSRPTNAQDNANLNHIRIVHCPERTKSEETILTNNNKDVITIYRESGNRVERQTGVIKTNTEVNNKNQKEPVYVVPAKKRSQRKCAKKCSIM
AY813336.1	SJC_S003014	1e-170	46.32%	98.76%	similar to putative neuropeptide receptor	GI:56753742	MILNIQLINSIQGYILILQSIIPCKAFINFYMEEEIKQKINFQQDIYQTNFTFDVAKEILPVKLLIITLYSFITLMGVTGNLLVVWVVLRVKLLQTITNIFIANLAVSDILMSLVATPFTPLSLYMSNWTLPEAVCKLLPTTMGVSVYVSTLTSMAML
AY813439.1	SJC_S000004	1e-172	32.08%	100.00%	similar to Vdac1-prov protein	GI:56753957	MEPDSGAKSLLLKNKFKHKHFNANLDLNFKSKHPLITGSIVLPIPHYPAFRIGAQALVNSENAEISKQVYAVNFKQSDVQVHAALTGHSDVDLSVFQKFKDMKLGFRVGWRQDTRETLFGAALRYRTSPAGKVKVKIDQNCVVGLAYKLKLSSDACLALCTQFDGKNLESGGQKYGIMFKFGS
AY813455.1	SJC_S000635	2e-83	18.96%	95.77%	similar to AAP05950 protein	GI:56753989	MLLTQEYWRRLFILCNVFFVIFSIVLLALGIKQQITLNQFNVILQESKPSIFLIASISGGLGVLSACVGIFGLSTKQKLVIYVHIFALIVVTLMEIGTATKVQESKPSIFLIASISGGLGVLSACVGIFGLSTKQKLVIYVHIFALIVVTLMEIGTATKVAAVDNQFTSDSLSTSIKNYEKDYKCQMQFDNLQSTFHCCGANSSKDFGTFPRFRSFQPSSCKYNTLLFPKGCISVLNEFVQKYVGVLMYLCFVFGIIQAIYIIMSIMNMTKFDESNSLHV
AY813467.1	SJC_S001123	1e-109	23.85%	99.04%	similar to calponin homolog	GI:56754017	MATRTQDFGIDVAISRKLNSRYDPDAERQVIGWIQQLTGQNIPLGRENVQRTLKNGRILVELINAVYERTPNLPPKAQTIRRPVNPNTGNAPFKQMENIQRFLDLSEAYGVPRECLFQTVDLFEARNMAQVLATLLQLGTECQRNGFQGPVCGPKPTYSQPRQWTEEKLRAGEGIIGLQAGTNKLASQKGMSFGAQRHIADIRCDDMTPEGAAVISLQMGTNKFASQKGMSFSNQRHIAEY
AY813596.1	SJC_S005510	1e-175	23.87%	100.00%	similar to P40_SCHMA Major egg antigen (P40)	GI:56754281	MLKNQHHQKSVVIPINQESKTFEQHRREMLTGLQHRHKGRKRPKLSNTTHIDTWSDVIDNWVDSSWRSWDDEMHRLRRGMFALLPLDTFGQISSIPDPFDLMHRMEGEIEEIRNRIGMSKVPGVGALTDFLKDAYEVGEDGKLYFKVHFDAKGFAPDNIKVNSTENRLVVHAKKVSESDSSTQSREFCRMIELPRTIDHNQLKCRLTEDGVLMLEAPVKAPDYESITFTDNRQLGIHPKSANQIQSIPSSKILALKGVSGPTILDDGANGKRLHLEVPVDPVYKPEDLCVNVDSNRVVVSGKIHKTDSSHSNKRSTSSYAEFTHSYEIPETVDPLLVAAQLFDNRLVLEAPLVTRHTVSH
AY813602.1	SJC_S000078	0.0	25.85%	95.04%	unknown -similar to SNaK1	GI:56754293	MKRMPRDPLHDKLVNERLISMAYGQIGMIQASGGFFVYFVIMAENGFWPSRLLGIRREWDSKAINDLADSYGQEWTYSQRKRLEYTCHTAFFASIVIVQWTDLMICKTRRNSIFQQGMWNHHLTFGLFFETTLAIFLSYCPGLDKGLRMMPMRFTWWLPGLPFSFLIFVYDEVRKFLLRRLPPGSWLEKETIISCSYSIIPLPPVSLPLLYIRIYTYILKYVYAFLSFLFTCVLHTSCSLN
AY813612.1	SJC_S000805	1e-105	15.12%	99.49%	similar to annexin	GI:56754313	MAKVSGFGITRSLIHAFDPHGKQYKPTIKPTTGFSASADAERLHRAMKGPGTDETTIINILARRTNYERQEIRHSYKSMYKRDLKDDLKSDTSGDFRKVLCQLVVDTPYMLAKSLYYAMKGLGTNDRVLIEILTTLWNDEMRAVANAYKEVLKDKGIEDSNRSLVTDMKKETCGDYEYALLSLVQAERDDIQLLQLKAIPEKGVNSVINHELAEADAKDLYASGAGCLGTREKRITRVICNRTPYQLYLTSEIYLKLYGKSLLEHIESETSGDYRKLLVSVLRYAIDRANLIAEWLHDSMVGLGTKDYALMRLLITRSEIDLQDIMKAYEVIYGKSLLNAVKDDTSGDYRQTLCVLLGE
AY813641.1	SJC_S004173	21	3.06%	96.00%	similar to AAP05893 protein	GI:56754371	MQTISSTFIIQLIFLLCTINTNVFSLKCYQCNSHIDNLCNNVKNSRERPKECPPHLQASCKTVIQDAPFIYNHNATNKPAVRILRDCSAILAETAQCIDRVGTDKVKMRYCVCADDACNQSSRISSFQIKSVVISLILSILTYSFSLH
AY813732.1	SJC_S002552	1e-145	24.95%	98.55%	hypothetical protein	GI:56754553	MCGLQALEDIKKLAEDDSRYTALMKPLSQDKTTLQGLVLLLSNKNKSIVSLVLQILIIIRRRPGGDDVLRSLLGLSEQLNDLKKSTNSIDNEDKRLISNSAEELLSLFNCSTKQNSPKPIKANPEKAHFISRPKSVILQLRGLTSEVISK
AY813810.1	SJC_S028071	0.0	44.77%	98.21%	similar to ENSANGP00000005762	GI:56754714	MINEHVFQRAINEKVLKKEGTWIDWQYLLLAADTLRNCRYTLKYTYPHAFYGEKLERKELFEYQQALLEAEVEDLSWKIEHAEITDRGDLQNKMDICEKHRLTLLQEFLTN
AY813876.1	SJC_S000236	0.0	49.92%	99.50%	similar to Q6NYX8|CA128_DANRE UPF0424 protein C1orf128 homolog - Danio rerio (Zebrafish) (Brachydaniorerio)	GI:171473946	QELLFNVPFTGSVKLMSIIISGVDNENHPSQVSLYKNKPYMTFEDLDAECDQSLELTIDPNGEVIYPLKIARFSNVQTLSLHISANYGGDTTRIHYIGLRGDYTPAPRREVVITNYEVTPNIADLKDTVLQTQSRFVE
AY813932.1	SJC_S000053	4e-92	36.23%	98.88%	similar to calpain	GI:56754963	MDIWEKAMGWKHIFLKHDKDQSGYCNVYELREALNEAGIHVSNLVFNAIVQRFTDPGSIKISFEDFMLCMVRLKTAFETVKAQPKNKDGSLVFTPEDYIRFTVAI
AY813942.1	SJC_S000547	2e-51	5.23%	100.00%	similar to AAP05974 protein	GI:56754983	MICNLPCRIVLIAMNSVSLIVGLALLIVGALMVWGQSVIQSLLNNFITNLINQYIQGSSGAQINELVTRILTSTSPVGMAVFILGCVCAGISLFGYCGACCNMKILLYIYAILVGILALAFLVTFSVYFSRKDEIGNKAIELFQTSVNNYQSMVANNLDSLVIGLILPPLNVVVWIVEKISRSQPISGEMILMVVNHIQILSILYRVVK
AY813973.1	SJC_S002713	1e-102	27.14%	98.50%	similar to solute carrier family 2, (facilitatedglucose transporter) member 8	GI:56755051	MAIALLAYGITHSTNSFNFKISEFWIILFMFGYSFGWGPLPVLISMELFPVSSRGNAVSSAIAVSWISAFITTEVFEAISTIISPSILFFTFSICCLLSMGYVHKYLPETSGETILPMDISSTKTASSSLYKQQLSA
AY814107.1	SJC_S009934	1e-138	28.34%	100.00%	similar to AAH76657 protein	GI:56755319	MRMLARLGQIDAVKVLAMQLVRTRNYIKKFNAIHTNLTTLSMKMQTQKSTAIMAGAMKKVALTLREMNSSMNLPQLQRVMMEFEKQTEIMDMKEEMISDAIDSTIGEPDDLEDSEAVVEKVLEELGIDLNAQLSNLPTAKDTIGSTVTNSVRPRAAVTDATSITGPAPNSGSNDPINENDLEARLARLKKK
AY814115.1	SJC_S000114	1e-111	14.52%	100.00%	similar to CAG01694 protein	GI:56755335	MDHSHHSPDHSSMQSSGHSMDMKMYFNTDLHYTLLFSSWIIDTVGKAIVACFGSFIFAIIYEALESLRQNLLLRAACNNRCGRVENSYGGPSCPGCQNPSDTNSNKGYLNPVESNEEVHVSVLQNSYYEKLRSYCTRYHLIQTMLHMIHAFMGYMLMLIVMTYNVYLLLAVLFGFTLGYFLFAQNRALLIRSHNCCH
AY814116.1	SJC_S000138	0.37	2.05%	100.00%	similar to lipopolysaccharide-induced TNF factor	GI:56755337	MDRKSSDSKGLSQSRKPSETSIIEQLAQNQKTFPKTFGRSSISSEKRRYSAQTASTSGAIPPRNSPRATPYVNAPITTGLTPVSPAIPRASIACIPMSVQAQLQQNQTVRSDQPSIAKPSTQPPLGRSFVAPSITPKVSLDKIPESENESTMKLGRSPKSFRCECCQHVTVTRTTYQVGALTWIMAVVIFLCGGILGCFLIPFLVDCCKDVRHECPFCGTEIGVVKCI
AY814150.1	SJC_S000960	1e-125	38.76%	99.57%	hypothetical protein	GI:56755405	MKLLDLKINRQHLDHSKTKDIISRVSCFIKEAEKAEADVMEGEADDGRYIELDLLIPSVASDEPLNLPVNFSDSSTESDDSESEGEFREIIVPHAERPGSSVPPRCTSRKLIEELKSMCTDDCMIENNT
AY814158.1	SJC_S000115	0.0	37.91%	100.00%	similar to P40_SCHMA Major egg antigen (P40)	GI:56755421	MSGTHQNHAVSIPVNREQCSFPRHRHELLQNVGKASKSGQLGSVVPYTEDWPSSVSNWIESSLKSWDKEMERLRRGMFALLPMDRFMVGIPHDPLGMMHEMDRHIEELQNGMGLSAVAPLGSTSDYLKDAYEVGDDGKVHFKVRFDAQGFAPEDINVTSSDNRVTVHAKKETTTGGKKCSHEFCRMIQLPKSIENNQLKCRLTDDGVLMLEAPVKVGENKSLTMNESGQVGIQPKSASQIQAVPASQALTVKGCQGLTVLDDGAGGKKLHVEVQLDPVYRPEDLCVNIDSNRVVVSGRHYKQKTDARRKSSSFAEFSQSYSIPETVDPLTVSAQVVDNMLVVEAPMMKQHEIAH
AY814201.1	SJC_S000024	1e-132	22.61%	99.60%	hypothetical protein	GI:56755509	MLGSFSQTKQIPISSDHVRVIASSCIGFIVVASEATIDGFPQSDDEKRTKKLELVNSLERKLCLSSSAKRDEKWTFTQSQGIALLIPLKHIPTVLINSETIQSGFCELLGRFIKRLCIHENPAICQIGYRCVGCFISHLTANHDVTYEPKALLELLGKGFEHSVIDMRMLSTVVSNHIAWHVKLPMPSWISTFVNILLAGTKDKNSPVRLGSETALAVLCRISAPKSNKDKCPNSGYLQACYDALDNNTRNQLETLVQRLRKQNWSEVWRQGCPDMDNTNSL
AY814261.1	SJC_S002038	7e-83	15.34%	100.00%	similar to AAP05975 protein	GI:56755629	MFCLKNKMPTRLFYDSSSRIGPIVIYADLGWTIIIDRTYGITLKNKGSHGYDPDNKEMSPFFMAAGPQIDGSRTGKLQERIKLIDIYSLICLILDLKPAPNDGSVCRVRPMVRYKSIANINRLPITSVITYVTLIFFISYNNLHC
AY814310.1	NC_002544	0.0	57.01%	96.50%	similar to NADH dehydrogenase subunit 5	GI:56755727	MVGSYYYLIGLGKNSYLVYFFQCCCFLTIVITSVCSLYYSDVKQLVALSTSKNISWVFLILSIGDYVLAFVQLLVHAVRKCLLFTLVGDYISSSYGGQDKNQINTKIYGKVFGLIYLFVLLVGLSGFPFMGLYFRKHVFLDRYTNIGFFSILFLFLVICGFIMSCAYSVRLFIILFGYLSFSVYSLRVDFNMIGLVVMISSIVGKYMCFLIYRPYRFFSFLSFFVLFRLLFGVVVGVVVGCNYIKYRRDWLGKLFGVDFLIDMYNRYVLYI
AY814401.1	SJC_S020573	1e-137	41.98%	99.21%	similar to CAD21525 protein	GI:56755910	MARIGKGIQSCLSWVHERDGRVPSNAIDTGHAVYIGRMYHSGDLIPGKVVPHLGKAYASYGGREYEFDSYEVLCDTKLPHISKQCYRWERHSNGYVPKYAVVGGITSSNEPLYIAREHIEGERVVGKIHEGHECAYFPFGGEERKMQHYDVLVLIK
AY814430.1	SJC_S000053	1e-136	30.60%	98.85%	similar to calpain	GI:56755968	MGRIQIVYSPDANVSGRVNHPGKEVVDPRSGKVIKVKRQTPDDYLNVLKPVKGPKRLEFNPYLPKTLTPKGYAKLKLMMSIASKQYETLVKNAKAERKLWEDPDFPANEDSIGNVQDIGVQIEWKRPHEIISNAKFFSDGASRFDIKQGALGDCWLLAVVASISGYPQLFNQVVLKDQELKGPNYVGVIRFRFWRFGHGWKCLLMIVFQYAEEVISLFLCIQVIQQNFGQLC
AY814456.1	SJC_S003049	1e-97	15.66%	98.94%	similar to tetraspanin TE736	GI:56756020	MNLSLQFWIRSFILCNCIFIIFNILILGVSTKSIKDLIEYSTVLNGSTPTIYTIAIILACIDAITAVVGILGFWKELKIITYVHIVALIIITIIELCIATVSAVTTDPFFGKVYNALNTTINGFHLKVDIPSEYDELQIKLQCCGLNSREDFDKRRLALPHSCQYLMTGFKRGCIEALTEWVQRYILTVIGLCFTVGIIQAIYLFIIVARIFLNKYGKRLSA
AY814468.1	SJC_S000149	1e-158	16.22%	100.00%	similar to his-tagged cytosolic leucine aminopeptidase	GI:56756044	MSLVTPAFPVFNLVDSAYDAVLLLNDDVEHLPNALQLALNALKEFSEVNPKFSDEVSIIPFPQHPSKRLIFSPTGQLNTDEADIRNVYDAAVNGMLKLLKIGCKSPLLCCGSFVSAPKDAQWSERNCLLLNAVLGAYHALYTPLEVREMLPEKFPKAIRFGVMEANDSLLNIAKAIEEGRTLARDIGGSDPERMAAPKIAEYLKNALDGLTGVTITINKVDAKKYPLMAAVNRAASVVPRHDGRVVHIDYKPSSSKEIDTSLFLVGKGITFDTGGADVKAGGIMAGMHRDKCGAAAIAGLMKTIGLLQPTGLSVSAALAFVRNSVGEESYVADEIIIARSGQRVRIGNTDAEGRTVMADLLCEAKEKALTAKNPFLFTVATLTGHVIRAYKNYTSGYG
AY814497.1	SJC_S000486	1e-123	29.54%	98.73%	hypothetical protein	GI:56756102	MYWLPIILFCIAKVNYIHMDVTNNTKLLNFSSNNKFYFCRSLLNYGNHGDSHKAIFHDITGYSQLENIIFKFIEVPLKLIRFNKKLLSKFMKPSGIKEAEFYFHGSLFYQSLEKMFNIFPDEISFEIVDEHLQTLMVSILTYETRSETFGYSASELRQCFQINDYVAQSISIFGDLSVKWLKASSPGFTRYLNLRRMLELTRTILNSGPSKSCNQCLKKLSLGCSIQMNVCI
AY814534.1	SJC_S001335	2e-45	18.08%	96.33%	hypothetical protein	GI:56756182	MKHISQASLVMFLIVVNTDYSMQLSCYECDYCPDPFNSSSSSVHTRNSCKWCAKLLVGHIPIRKCAADCSFEYFSRDYHQLSYYCCQKDYCNKGVNTHGMHQILLMIIITFICFFINKKI
AY814537.1	SJC_S000325	2e-76	23.73%	95.48%	similar to Sm29	GI:56756188	MNSGFKFTGIFLYILINILDKYQIQSFRCYVCDYCPMVTDVSISPGSSCTSCAISGVDYDVHRICIYNNSNPPINFPKVNQKVCIGDLCNGEAVRNASGTPQGPIARPISCYSCLNCTNNNQEVRNTCGGCLTVTSSGLKHKFCGPTCDAVRSDVEVSCCSTSFCNGMIKLSTQQSSIISVLIITAISGYIL
AY814549.1	SJC_S000172	2e-74	13.20%	100.00%	similar to SPARC	GI:56756212	MHLSLILLQLCTFYLVLAQEEYHKVEEEPDEDPCENVKCKLGEICKEGKCNCMDSCPSEWNSYNRQLCVDGVTYRHECDLWRNQCYCRSGDTRCGSDQFSSHRANENSAIKYYDECRDLSGLCDWDQNESTFSLRLGMWFQELLRQKWSSASWSIDDDSLLRPMDAKARSTTSKLVSQSSSHERVNGAVISYWFCELDRRIEDHYNKMI
AY814600.1	SJC_S000141	1e-163	50.85%	99.33%	similar to ferritin light chain	GI:56756318	MAFFTYFDRDDVSFPKAAEFFRKASHEEREHAEKLARYQNKRGGCVRYSDIKCPKKTEFNGLEDAMNTALSMEKAVTDSLLKLHAIASKNNDPALTDFIESEFLHEQEEAIKRFADYLTETQRVGKGLGEYLFDKLTLNE
AY814738.1	SJC_S000279	3e-99	29.80%	100.00%	similar to Sm29	GI:56756595	MDNALKFIVISLFLLLFTLNTCHSRYYTRKPIKCFVCTNCHDDNQEIVDECGGCKTTIKNERMNKTCVSTCNIVRRNVGTYCCSKDKCNSMSVGYMMYLMNTGQGTYYHLRNHLDD
AY814773.1	SJC_S004449	0.0	52.88%	98.88%	hypothetical protein	GI:56756665	MRNKRIVNYQQERDYIDDCLRHVGSKQHLFYETHVCTIYRINANPAEHFNETKALVLLEKYRRKRQSHCTGSLLEDRISFERNKASGKIPFRPWVTYKEIKEIYMNRSRPHFFVLCIDSMYSSMRYYEIYKCKIPETAQTVSEYIRRAMNDQDKVLRDLTSIRQVYVDDIGRVRSVSNFELENNRETIQISESNQNYYAHNNVSPIYLTSPVMVAPLKHNYNPEDTNAKRRTIENLMDVTYITYDPHRGIVTNKNGPVYLYMYRPKSQGTLGNNSIYSDRRSSLDYRNESHHRNYRY
AY814817.1	SJC_S002532	0.0	45.27%	97.43%	hypothetical protein	GI:56756755	MSKKEVRNLLRTNHAHLPTIVTCLKRGRFLDALDLSFLLLDHPSWAVYCEPWRLLRKSIFCIGKTNSQVLHAWTIRKVYWNKLQFSLSNLPVIGKSMKSLLNKLDLCKLDQFNNDKSKLKSYSDVQLTIAANMGPVLFHESYHTDLFS
AY814882.1	SJC_S000054	0.0	17.34%	99.72%	similar to NP_060707 protein	GI:56756885	MVMKLISPSFCLYSAEQTPNKITSPSATQSKDDSKDLSEKDRRRLERLYRLGDKPAIVIHPNKSAKGGRFDCHRVSLFSLLDYRTEDQKEHNFEVSLFAEQFHEMLQRDAAFTIFKAIHDAPEKEIKPEQDGKLENGFDSDEPESKRRRNDSQNGYNDEQDDVKIRRLRRTVNPALLFAFTYFDISRAGYIREHDLCEILHLLGLRYSRTQMRKLVARVATRRDHVSYHNLTDSDIVEGDDKDVVSMNVAVEEDVEVTRMLALGNRALFDMTVPQTPARIVIGGGNTEQMLKRVELAEAVKHKMEFQFFQIKDELEKTRVKVNSFKDTEDELRAENRDLASRLKSEQKQLHEYKSQANTYNHLLRLARDQMDKVLFDINKQFDKGKGKARSRKSCRRCG…
AY814977.1	SJC_S000000	1e-164	17.26%	100.00%	similar to XP_392257 protein	GI:56757075	MSMQEFSDNLATLSYMSRHRIPTWIYDSKNKTLFGRTLCSWTLCILFYLIYYACLATFFTCLLWLVLYCNVPENQPARTGMQSLLDFKPGLGFRPLLDVQKSLISYSSGDSQTYLPYTQNMDAYLDTYIQVNAKPDSQFASCEGKQGETKDVDKVCKFPLEKLGPCTSRDNFGYSKGSPCVLLKVNKVFGWMPSINNPSASNDILVSCSGQNPADEENIGALGYYPSITISGKQYGVFSSAYYPFLGQAGYLGPLVAVEFKSPKKSVAILVKCTLSNVKNANKDDLNFEIMVD
AY815038.1	SJC_S000904	23	2.36%	100.00%	hypothetical protein	GI:56757197	MPRSKTIKRPLEVEDFEKCHHRQVLVNTFLEKSMHILSPNSYMANGYAVKSNDRPYVTPTCQTIAQKEMDCIKQIERQLSPEYPCITIYYSDMDSELENKIILYIARKWDRNNPFTTMSPLLNELERDYSRGWKFERLTNPIRVGRQSASTKARSTFCFRYEPDCYIYKFYNDWEADRR
AY815056.1	SJC_S002232	9	1.58%	100.00%	similar to XP_392549 protein	GI:56757233	MDRAPAAYETTYETRYETTDVSSVINVGFVRSLSGILKLCQILLSCIVLICVAATTAWSIYPSGGWVNFVASVTLICASVFYIFYLFNLIRKLPGPWIIIEFSVLLICTFFWFITLIVAAANNGKGSGAIAAAVFSAVALGVYITELATRFRCERRGNGFIITMTGVMTTHATRAPPTFAHSAPAHMSGESTDPHIGFSGAYAPGERADEGYVMP
AY815101.1	SJC_S004009	1e-148	15.27%	100.00%	similar to S31909 cathepsin B-like cysteine proteinase (EC 3.4.22.-) - fluke (Schistosoma japonicum)	GI:56757323	MLNIAFCIVSLFTLLEAHVTTRNNERIEPLSDEMISFINKHPNAGWKADKSDRFHSVDDARILLGGRKEDPNLREKRRPTVDHHDLKVEIPSHFDSRKKWPRCKSISQIRDQSRCASSWAVSAVGAMSDRICIQSGGKQSVELSAVDLISCCNYTTQYPVIP
AY815113.1	SJC_S001566	2e-05	4.48%	92.11%	similar to SM22.6 antigen (A12)	GI:56757349	MERLIEIFFELDKDNNEIVDKQELINYCQANKLDMKMVDEWLSKCDTDKNNKITFDEFCRGFGIKLNEMRVEKVERALIWDKVEPVKLTNVNIIKSTMSETKQTKVIETFDKLMQQYGNSESTLDKVSSGLKKFLEETYGNVWHVLIMNGSFWMSYSHEPFCSLQFKKNNYSCSIWRTPNGQRYGS
AY815140.1	SJC_S001176	1e-106	15.76%	99.50%	similar to annexin	GI:56757405	MSLDSSVNVYYVLAEIIIMLLQLYDKQTPPFSRSTLHNINTEGILYEPTVVSSPGFSPENDVYKIGNMTRDEKNDKLLEVLLSRTNAERQSIVRNYQKLFNKSILLEISDINMRSMKLFIQDMLTDTSMLLADELNKAMKTSDLQLVTSILIDFWGDEFNQVESVYRIYSNESIWQHINNSFGVTVKNILRCTVMTRKHEQKLDYPIKGKGGKRIVETGFVTKIHEILTRKLATKEYTAQSLEKLFCLLYPFEMEMLNKQFNEKTTGKDLSAFIENNTNGLMRDVLIAMLNHSVNKPMYFATIIHDAIHKNQTNTSTVHRLLISRSEIDLYTINKEYKVKYGKYLLDDVKKTFDGIYGKFLAKLLQNQELPKIF
AY815164.1	SJC_S000376	0.0	83.87%	99.67%	similar to heat shock protein 86	GI:56757457	MSLCVKMSRKFLARVSEKVSISNRLTSSPCCVVTSEFGWSANMERIMKAQALRDSSTMGYMAAKKQLELNPYHPMIKALKDQFESGDSIKLAKDLVQLLYDTALLSSGFSLTDPKIHAKSIHHLVCMCLDIPDEEMKGKCVAADNGPTVAPPAEAGDDAGMEEVD
AY815177.1	SJC_S001831	1e-73	26.25%	98.03%	hypothetical protein	GI:56757483	MMDMKAEVFFLIVKLLEDEGCISAAESLKKFIDDKKLLPARINTVGVPFDNTYDNYDSLHNLSKPSVLVEYYQLLVKLVNDGNKCASHLKTLIGIQNKVEKAFTYEHVYDFHMGSKDHNKSRKSLLSNLHHHSKLQFHI
AY815196.1	SJC_S000081	1e-109	12.84%	100.00%	similar to AAP05961 protein	GI:56757528	MSIHSMGRRYHRGFTGRISYINQWVKYSLCLANFIFLTIGTVFLVFGAIAFIESGGIPWKSNITALQWLFNLTVICTGVGIITLFVSLAGFIGSLRENNCLLKFYYSILTLLFLTEVICCVLFFVYRESAIRKLEELIKTTFVTQYRELGFEDTTNFMDFIQKELNCCGPKSYLDWTANRYFSCNKSNVSPEACGVPYSCCRQMNNININVINTSCGFGVQKSTTAVASRLVWTTGCVQALINVVESNIVHFACGVSGVAVLQLLAILLAKTLHTQISDQLRLLRQENIHF
AY815248.1	SJC_S002090	0.0	34.14%	100.00%	hypothetical protein containing Heat shock protein DnaJ, N-terminal domain	GI:56757669	MILSRAGEIMHRFMLQLNEWRNFSTKLTHEGMKAFELLGISSSSTPDECKKAYLNLACSIHPYVKNDSIDSNDNNDLQKKANIEFHRLHQAYTLAYKICANNHQLSRNDCLLKQLDYDIREFRNKAPHHRRFLDLERQEHHLNRFHQPIKNGNLNERRKSLQSQRITKAQHRAANYRVEKIMESVNHDDDSQGDYNKLMQRRPSVKENNADIYTDFETEVKEFNLIVPSPEMQRFHLDSKTAIDQLTRKEHSQIDEESKQIDHATTEDQNKNDTPKSEDDNQSLWDPRYMAEVMHDFYRELAKSFVSILRGFKDHK
AY815303.1	SJC_S000711	8e-85	23.45%	100.00%	similar to AAP05968 protein	GI:56757789	MSLSKYLAPPLTSLPLCLPRYYGGVILVGVGAFGLNAYFVRRVMQARKEHNVELPIMYHPTDKLFNCIQRGHQNYLEVLPYFLMALFVGGLRYPRTYTACGVIFLLGRLIYFQGYSTGDPGKRYKGSISMIGGLPMILGLLVFGVQHLVASVRCTACTLRR
AY815332.1	SJC_S000681	1e-147	31.85%	100.00%	similar to XP_393132 protein	GI:56757848	MEYIMPATCTPSEFRQMWSEFEWENKVTVNTQIKDLFTYLSQITSHTNLRCLTPTEALLGDCDYLCVTLYAKTIFGEHVLANLCLEKSEADQPVTGHVRIRAKTQGMAVTMGERVSSCQKNWPVSNSQTLNDNGEKHQNDEDTNTNLMRSHSPVNTLLNSH
AY815419.1	SJC_S019082	6e-96	15.17%	100.00%	hypothetical protein	GI:56758022	MKSPKLTATPDSKSKQLSNGKTTPARPTSKRPIPVGSDDSDAETESNVLCNNELKTSHKKSHSKVSFSGGPKGCCFKAEVFFRSKIKTCASRWTRTQNRCRLGFSGRCKEIRHKRVVQRSSLSFA
AY815442.1	SJC_S000532	1e-105	14.11%	100.00%	similar to AAP05974 protein	GI:56758068	MVNMLYRLILFTVNAVIGIIGLSLVILGGLMTWSKSTATKAFGDIWTTYINKMNLTNTSIDRSIGDAVLKMSSHYSQPIFAIGIIILLICIAGILGSCCKSYLCLKIYIVGISIVILSHLIVLAIYFARKQAPQAFFIKLLNYSINQYESISSADTNSVFMGLVMIKFNCCGAQNGSDFNHSMKFAKSDVWNNKTFTTLSYPIPCCKFNKNLEIQDKSCPNKFTDTNSNINTGCLKPLHHFLFHYTDIAAYISIVLLLCEIILLLMAIMISRGK
AY815489.1	SJC_S002560	4e-91	13.00%	99.43%	hypothetical protein	GI:56758162	MYRQHLKSVSVILLSDQCCSIEWDPNAESERNFGFNVIEPNDSDFTSNHVSNLINQHSNKMDTVNDNVDNCSVKRPRCNSTPGGNPSQTGLVLKSILKQRSISESSGDEMVILDGNILRDAGLAGNNECYLTLDDFPNSSSDATYDIVASNSDFRRCKSNDKLSGTCQNGALQSTQCRPHSTVCRPRIRSVSFCQQDQHVDFSPRDTVETLHNTLCTIRKNLRKREAHRRRASGGYSRQPNSDKKMHSKMGCDIGTPMLDTCKSLGDASLKESDHCNGNSNYVVSERNSDNFTELSTVNILPDTFNPDETEPIITLHSPESGIANPSSTDVSNHQHLTNPVVATKCVENIVELAPKQLEAINNGGSINCDFSAVHLTASPILELDEE
AY815616.1	SJC_S000684	1e-140	88.74%	87.74%	similar to beta-tubulin	GI:56758416	MFDAKNMMAACDPRHGRYLTVAAIFRGRMSMKKVYEPMFNVQNKNPSYFVDWIPKNVKTAVFDKPPRGLKMSVTFIGKSPPIQKLFKGGSEPFTAMFCRKAFLHWDPGEGMGEMEFP
AY815649.1	SJC_S000556	1e-123	18.25%	99.14%	similar to A43292 protein-L-isoaspartate (D-aspartate) O-methyltransferase (EC 2.1.1.77) form II - bovine	GI:56758482	MLHVDRAYFAKSSPYEDRPSSIGYGATISAPHMHAYALEALKDHLKPGAHALHVGSGSGYLTACMALMVGPTGVAVRIEHVDKLTDFSLSNVRNWFNHSQYAQSSGIELGKQLKLVTGDGRQGWLPDAPYDAIHVSAAAHMIPDAEVALTSFFLYYCFACFFPLRNQKVVSSMQPIHISCNKVLIVLCCYLDMISLMIFMYLV
AY815690.1	SJC_S000834	1e-157	18.13%	99.00%	similar to myosin heavy chain	GI:56758564	MTEETVVEEVNYEEQYGVLVEENKKLKIDISSLQLSNRSLVNQNRDEKKKVMDCRLQIADLEGRLKAFDSTKQELADSQGQCERVRMTLESCEAKLADAERRADEASGLIKIKDSIIVKQSNFTKEIEERLRNVTEERDNLLHKTSNLETELNIAIVRGEDADDLKERLKALQELFDSLVNERSETTSESGLAAANEYFQSEQAKSESRITELKEIKGGLEQKIEELCDDKKKLQMQLEQQFDEYEKLGEKCATLEARIKEMAHSERRYGGGILGGRLIGPTLPPWIADDKKLENDLERLSKTDPATLRAKVMELESQVNELNQLLTYREDVILRIHEEISKKASKLEAADVERSSLTAQISILKRELATAREDLARRGVGPIELKLRLTVYEINGIEN…
AY815791.1	SJC_S000818	2e-79	17.67%	98.73%	similar to CG12130-PA	GI:56758766	MIIMKTQNLCLHFLFNLLLIWRYTTCRDDDLQRYSFQNDDDDDYNDNDELPKQNNFLVALNGFWPSKYVNKYLGVISSTKATDESASNVFVLHRDDRVWDTNTFDRQNNYRLNKSDPIQNGVLVQIFDGEIKRTYLPTKFYLPHGLTIDPNGNFWITDVALHQVFKFPPDLSNEPLLVLGERFKPGSGMNQFCKPTGRSSCYKWTNFYFRWILNSRIMKFNENGEL
AY815815.1	SJC_S002622	3e-45	9.87%	98.97%	similar to tetraspanin TE736	GI:56758814	MWASSTSPTFPTILFTSGLGLIPACLGYIGMWKKMNIFFILHIIGLSSPIILNLCVAIISPVKLDEFYTMSQQALDDSVKYYYKIDEYADEFDMLHTNFHCCGANSYADFRKARLLIPYSCRILQFVYARGCLDELHKFVEYYVTVLMSICFFTSIIHTIFLVISIIHLRRSIKRINKDVEIKE
AY815834.1	SJC_S000197	0.0	20.34%	100.00%	similar to CAG11418 protein	GI:56758852	MNLPLYKMSCCPGLSAICVLRRGVYNAAASGLAAQRNDVLITQSAEGIKLVSLPQPSLGLGCARVALVVKSGPRCESSKNRGISHLMRRSFGISTPELTSVNLTRHLQQMGARVQCTTTREHMIYTVDVAPNFAVRAGYLLCSMASASCYYSWELNDIVYKLMRKDVDTLNRRNLSGLGMELLHEAAFGTSDSGCGLGYSLISPVDRIGSHLIDQINEYHSRAFVGEKCVSGIVHSRADVDGIDILKQVTSSINLNPPHLEASSDNHGFVGGEIRRDLIAASTVYAYLAWPSRGFWPVCDLIVCALNGSSNRIHHGGNASKSLLARTAIEGDIDTEAVAFHKVYSDHGLFGIAVAGSCPKTVGSRIKRIISVLRSANFTEENLKQAKQILRADLMFRYE…
AY815838.1	SJC_S000412	3e-65	36.40%	91.24%	hypothetical protein	GI:56758860	MFLSVFLICNILLCTTSTFKLVNERSTNEEDHSDSQALKLSKLQSEDYAPRYLVPDIEEFNISSPFINEQLRNQMDILKQELEEIAKKLNHVPNSCNSNLYNGLLVSICIGLFSIITLV
AY815859.1	SJC_S000069	4e-96	23.00%	100.00%	similar to AAP06083 protein	GI:56758902	MTTPSLSKVGSCVVQSALGSQTVTLESFWRDRTCIVTFFRRMGCKFCRLEAKNLSYLKPALDTRNIKLIGITFDVGGVKEFLDGHYFDGDLYLDPERMTYKALGYKKVSPCSGAISLFSKAARALNSKAKAAKIPGNLSGDGWQTGGLLVVEKGGKILYYYEQKEVVRHPDYKKIIDVLKIDTKDVPEFATVLSQECDDSCKM
AY815945.1	SJC_S002456	6e-26	3.77%	100.00%	similar to XP_394460 protein	GI:56759074	MQVTKIISRHRPMYKKARIIFPLLLPVLLGLASLHPIATFLILVLCLVACFNIVIVVAPPTCSLEDTSLVYKSGRVCGFLSDVNMVYKCSVIILLLWYFTMLIPVNLENKLLYKEIIVYNILIVVCVHLVQVIRNAHPCSVSHTVISNSQYLGNKPGKNENNLTIIGLWKHTLRILRGTNKFNFEGDWYFAWMNIFVSKFNRAWSIVLLTVSVVLTFYSTSLALTSVCTPKIYFDWFLLPHDCTFIYDVYSRAWVFVTVLFWLITSIIPISFLSHELVVYVRHRSKNW
AY816000.1	SJC_S000191	1e-110	12.34%	100.00%	similar to cytochrome b561	GI:56759184	MDGYNPVESPSGSPKSFIYLVIASQIFGLLAVVLTAVWLGKFWGGFSWTNANTVFNYHPLFSVLGLVFLYGDSILVFRVFRSYRKLPVKILHAVLHILAFLFGVLGIKAAFDMHNALSIPNLYSLHSWLGITAIVVFGLQWVGGLIGFLVPQTPQIARSKLLPIHVTFGSFLYLLMIGVCISGITEKNFFSKNYSVLNARELIGNLIGVVLVIFGGLIFYLTHHPNYRRIEPVPPECRALQK
AY816003.1	SJC_S000665	3e-92	14.41%	94.91%	similar to ThB gene product	GI:56759190	MKVLGLCMLITLLLNGINCMKNKKVKCYRCSDCPNPFDKTQVTELANCNFCRTVYTYRDEDNYRIAKDCVTSCVPQDRRGGKTGLVTECCDEDYCNTASKQSSISFLLISSITMLLIYTNHLMH
AY816005.1	SJC_S000154	2e-98	18.79%	98.95%	similar to fasciclin-like protein	GI:56759194	MRKIIMNYMVNMLKNQLFLINFILLYSLLIKAQSTTDKNLWQVITSYSNVSKFADFIREIGLQTLLEKPGCLGDDECLTIIAPTNDAIDLIANDLAWYSLGDFQKHSFIHSHIIQRGITTDQSSIRVTTRDWTKLNRQMNFIDIGFGTGVDYTTLFAKQRFGFSTTVNSTSLYFVNNAKIVTPDIMASNGMIHIVNQVLYTSHISLPFMDFLDKQGNLGISKELWYLLLQEPKYTPYPAQNIYSTVFVVSNSGWNSVPTVHMNRLRKNITLLASILAYHYCPNQLIIVNGFQ
AY816044.1	SJC_S000078	1e-124	45.95%	92.45%	similar to SNaK1	GI:56759272	MDVLRKLYNKLPCKKKHEKDEQKTDLNELKQELDMDEHKIPLSELYARLHTDPNIGLKPDEAKIRLERDGPNALTPPKTTPQWVKFCKTLFGGFSMLLWVGAILCFIAYGIERNFEDESSNDNVSFISYVKYLIL
AY816048.1	SJC_S000176	0.0	91.99%	99.29%	hypothetical protein	GI:56759280	MYRLLLFITFLSQSLSVDYLKFEEIQAASKESLIFLNDVNPTTLLDASANHHRIVYFSIKNPVMELKLTFSCLVNKQENPLSKVSLCCRKSVDDAKRTCFHPRGEGTSSCLNTEFHFSVDEKTGANFSSSLTTSLSNPISGLFSCVVAADEFNVVESNEVEIRDAVFYIRQLKSEASNKVDVVSPIYEFPYELRCSDDTNIVSRWAILDAPTRW
AY816125.1	SJC_S000035	7e-51	16.45%	100.00%	similar to RIKEN cDNA 2400003L07	GI:56759434	MNFIQSNRSIEERVHAEFTSYLNDRISYLKKHEEYWQEKSDKDIMQFKQELNQLKDKKERNLNKLKELSSLYKEYEAVVLSDRIEKEKARQREEQAELELHAACKIQNWWRTICVQHNLGPYGKKKRKGKGSKGKKEKGKKK
AY915235.1	SJC_S004004	1e-123	32.89%	100.00%	hypothetical protein	GI:76162542	SGYGSHSFGNNGGEGRSTDFQRHRSISEGGAAYHLEAGEDNRRDHHNQLERKRRASIKTSYNDLREVIPGLRGSKASRAVILQRAVECIEELVKLNRDHTVCVETLKRQNDLLDSRVQELQRLVQRMDGEETCNTPTSSSPPANTVCPNNNVALRLISSTASGVPMYRCMPQDALQSSISPECPGTAPGTEYVSSSHVPVLQSQKPILCTMASYSPSTLSRANTI
AY915291.1	SJC_S000403	1e-127	28.52%	100.00%	similar to fatty acid Coenzyme A ligase, long chain 5	GI:76162582	QRGEVCVKGKRCTKGYYKNPEETAKLYDNEGWLHTGDIGEWTPEGSLKIISRIKSVFKLAQGEYIAPEKIEMVYQHCRLINQIFVDGNSLKNYPVAIVVPDFTELRSSLNNTGVLQCSKLSDSAICQNDIVNKFLLLKMNAVATEKALKSFEKV
AY915388.1	SJC_S000045	2e-82	21.56%	100.00%	similar to dynein light chain 1 (Schistosoma japonicum)	GI:60692096	MPFGKAVVKNADMDSIMQEEAVRTAASAREKFEVDKDIATYIKQHFDRSYGRTWHCIVGKQYGSDISHEERSFIYFFLGDRAILLFKSG
AY915571.1	SJC_S000384	0.45	6.02%	100.00%	similar to Beta heavy chain of outer-arm axonemal dynein ATPase (Tripneustes gratilla)	GI:76163033	DRSWKASKAGIMSKVDLFLHNLINYDKENIHENCLKAVQEYLKDPEFDPELIRNKSTAAAGLCSWVINIVQFYNIYCDVKPKRDALNAPNEELRQATEK
AY915721.1	SJC_S000138	1e-153	67.30%	99.29%	hypothetical protein	GI:76163151	MWYTLLFFTLLLDSIAPWPMSLINSSEFTTKPSEFKQHPFKESAIGTPTFVVSTT
AY915793.1	SJC_S000005	1e-107	32.79%	93.31%	similar to ACT2_SCHMA ACTIN 2	GI:60699471	MQKEITALARSTMKIKIVAPPERKYSVGIGGSIWAPLSTFHQMWISNQEYDESGPGIVPRKCFKVIYLYYLFNYSLLIIHTVTIIITIMRILSC
AY915861.1	SJC_S000001	0.19	3.99%	100.00%	hypothetical protein	GI:60700790	MESLTEDLALKSSRRQQIIDKIVNSAKNEVEKARQLADARASAQSNLLRQINDDMSNKENSRRHHLQNIVQQCQSEIEKVESVRSRRSVSNSIE
AY915878.1	SJC_S000423	5e-50	43.71%	93.60%	similar to copper (CU) Chaperonin, functional, complements yeast atx1 mutant (7.6 kD) (cuc-1) (Caenorhabditis elegans)	GI:60701174	MEGQIRTYTFNMEMSCEGCAKAAKRVLMSLGDAIKEVEANVQSNTITVQTTLPADDILHKLEETQKKIVLVSS
AY915907.1	SJC_S026326	0.0	65.03%	98.92%	hypothetical protein	GI:76163220	YLDVVVGLAYRDDAIGLYWLGQAFLKVLPCQAGRLKSGKTKSSKFELREQSCTADCTEV
EF553319.1	SJC_S010071	1e-83	24.36%	95.77%	membrane protein; SjTSP; expressed in the tegument of adult Schistosoma japonicum and schistosomula	GI:146760787	MALGCGYKCLQCLLIIFNSGVFICGIGLIVVGALGLHSTVNHWKELDPPLQSLIIFIIALGCFLFVLGALGMFGACTKNVCLLTTYCILLSILIIAQIAAGIYAIIEKPKVKRHVTTALKDLVGQYGHDRHLDKVLDEIQDKLQCCGAESPADYSRGPPPSCKNYNEGCIGKVTDLTKKHLNATIVTVFIFALLQMICLVFAVCVLMAIKRGDDE
L08198.1	SJC_S001566	0.0	43.37%	99.41%	22.6kd tegumental associated antigen	GI:161127	MATTEYRLSLMEQFIRAFIEIDKDNNELIDKQELTKYCQQNQMDMKQIDPWIARFDTDKDGKVSLEEFCRGFGLKVWEVRREKEELKRDKEGKVSTLPLDIQIIAATMSKAKQYNICCKFKELLDKTSRTGDEVRALANDLKAFLDSEYGRVWQVIILTGSYWMNFSHEPFLSMQFKYSNYVCLLWRTPSS
L23322.1	SJC_S000012	8e-94	29.05%	100.00%	fatty acid binding protein	GI:349804	MSSFLGKWKLSESHNFDAVMSKLGVSWATRQIGNTVTPTVTFTMDGDTMTMLTESTFKNLSVTFKFGEEFDEKTSDGRSVKSVVTKDSESKITHTQKDSKNTTVIVREIVGDTMKTTVTVDDVTAIRNYKRL
M14654.1	SJC_S000279	4e-65	17.05%	100.00%	Sj26 antigen	GI:160927	MSPILGYWKIKGLVQPTRLLLEYLEEKYEEHLYERDEGDKWRNKKFELGLEFPNLPYYIDGDVKLTQSMAIIRYIADKHNMLGGCPKERAEISMLEGAVLDIRYGVSRIAYSKDFETLKVDFLSKLPEMLKMFEDRLCHKTYLNGDHVTHPDFMLYDALDVVLYMDPMCLDAFPKLVCFKKRIEAIPQIDKYLKSSKYIAWPLQGWQATFGGGDHPPK
M63706.1	SJC_S000040	1e-97	16.32%	98.94%	Sj23	GI:161082	MATLGTGMRCLKSCVFILNIICLLCSLVLIGAGAYVEVKFSQYEANLHKVWQAAPIAIIVVGVVILIVSFLGCCGAIKENVCMLYMYAFFLIVLLIAELVAAIVAVVYKDKIDDEINTLMTGALENPNEEITATMDKIQTSFHCCGVKGPDDYKGNVPASCKEGQEVYVQGCLSVFSAFLKRNLIIVACVAFGVCFFQLLSIVIACCLGQRIHDYQNV
ID	ID SchistoDB	E-value	Query Length	Identical	Name	db_xref	protein sequence Pubmed
XM_002571859.1	Smp_004470.2	0.0	1	1	Peroxiredoxin	Thioredoxin perioxidase 3	MLLQGFIKGALRYNRSSVSNLCRHYAAHVQRPAPDFCGTAVVDGQFKEIKLRDFAGKYLVLFFYPLDFTFVCPTELTAFSDRIDEFKNEGVEVVGVSTDSHFSHLAWINTPRKEGGLGGLRYPLLADYQKQVTRDYGVLHEELGVALRGLFIISADGIIRQITINDLPVGRSVDEVLRLVRAFQYTDKYGEVCPADWQPKGPTIKPDLKKYKEYFHKVN
XM_002577195.1	Smp_059480	0.0	1	1	Peroxiredoxin	Thioredoxin peroxidase	MVLLPNRPAPEFKGQAVINGEFKEICLKDYRGKYVVLFFYPSDFTFVCPTEIIAFSDQVEEFNSRNCQVIACSTDSQYSHLAWDNLDRKSGGLGHMKIPLLADRKQEISKAYGVFDEEDGNAFRGLFIIDPNGILRQITINDKPVGRSVDETLRLLDAFQFVEKHGEVCPVNWKRGQHGIKVNQK
XM_002580638.1	Smp_176200.2	0.0	1	1	superoxide dismutase [Cu-Zn]	Superoxide dismutase	MKAVCVMTGTAGVKGVVKFTQETDNGPVHVHAEFSGLKAGKHGFHVHEFGDTTNGCTSAGAHFNPTKQEHGAPEDSIRHVGDLGNVVAGADGNAVYNATDKLISLNGSHSIIGRTMVIHENEDDLGRGGHELSKVTGNAGGRLACGVVGLAAE
XM_002580386.1	Smp_095360.3	0.0	1	1	fatty acid binding protein, putative	Fatty acid binding protein Sm14	MSSFLGKWKLSESHNFDAVMSKLGVSWATRQIGNTVTPTVTFTMDGDKMTMLTESTFKNLSCTFKFGEEFDEKTSDGRNVKSVVEKNSESKLTQTQVDPKNTTVIVREVDGDTMKTTVTVGDVTAIRNYKRLS
XM_002571815.1	Smp_003990	0.0	1	1	triosephosphate isomerase, putative	triose phosphate isomerase	MSGSRKFFVGGNWKMNGSRDDNDKLLKLLSEAHFDDNTEVLIAPPSVFLHEIRKSLKKEIHVAAQNCYKVSKGAFTGEISPAMIKDIGCDWVILGHSERRNIFGESDELIAEKVQHALAEGLSVIACIGETLSERESNKTEEVCVRQLKAIANKIKSADEWKRVVVAYEPVWAIGTGKVATPQQAQEVHNFLRKWFKTNAPNGVDEKIRIIYGGSVTAANCKELAQQHDVDGFLVGGASLKPEFTEICKARQR
XM_002576947.1	Smp_056970.1	0.0	1	1	glyceraldehyde-3-phosphate dehydrogenase (phosphorylating)	GAPDH	MSRAKVGINGFGRIGRLVLRAAFLKNTVDVVSVNDPFIDLEYMVYMIKRDSTHGTFPGEVSTENGKLKVNGKLISVHCERDPANIPWDKDGAEYVVESTGVFTTIDKAQAHIKNNRAKKVIISAPSADAPMFVVGVNENSYEKSMSVVSNASCTTNCLAPLAKVIHDKFEIVEGLMTTVHSFTATQKVVDGPSSKLWRDGRGAMQNIIPASTGAAKAVGKVIPALNGKLTGMAFRVPTPDVSVVDLTCRLGKGASYEEIKAAVKAAASGPLKGILEYTEDEVVSSDFVGSTSSSIFDAKAGISLNNNFVKLVSWYDNEFGYSCRVVDLITHMHKVDHA
XM_002572296.1	Smp_008660.1	0.0	1	1	gelsolin, putative	severin	MAGVLAAKMYSWKDTNLALFGSDIERAVKKESAEKEPAWGPVRKITSPTLMVWRIKNFQLEVVRGEDIGKFFRGDSYIVLNIEKVGDELLYDVHFWIGRESTADEYGTAAYKTVELDTFLDDKAVQHREVDGFESDLFKTYFNRFETLAGGYASGFNHVKPNEYRPRLLMFHSVDRKTMELIEVPFSRRSLDSTDVFILDMGNQAYQWNGRGCSKEEKFKASQFLQQLECDRNGRCKTEVTDEDGSEEHKKFISLLPDVEIGEKVQQKIGKKVIYRVSDESGKMEISLVCENALPKSSLTEDDVYLIDSGQSLFVYIGVKCSRREKLDALSHAHEYLQKTDHPFAPITVVSNNRKSKELDKVLE
XM_002575933.1	Smp_046600	0.0	1	0.99	Actin-1, putative	actin	MAEEDVAALVIDNGSGMCKAGFAGDDAPRAVFPSIVGRPRHQGVMVGMGQKDSYVGDEAQSKRGILTLKYPIEHGIVTNWDDMEKIWHHTFYNELRVAPEEHPVLLTEAPLNPKANREKMTQIMFETFNVPAMYVAIQAVLSLYASGRTTGIVLDSGDGVTHTVPIYEGYALPHAILRLDLAGRDLTDYMMKILTERGYSFTTTAEREIVRDIKEKLCYVALDFEQEMGTAASSSALEKSYELPDGQVITIGNERFRCPEALFQPSFLGMEASGIHETTYNSIMKCDVDIRKDLYSNTVLSGGSTMYPGIADRMQKEISALAPSTMKIKIVAPPERKYSVWIGGSILASLSTFQQMWISKQEYDESGPGIVHRKCF
XM_002575798.1	Smp_045200	0.0	1	1	22.6 kDa tegument antigen, putative	Sm22.6	MATETKLSQMEEFIRAFLEIDADSNEMIDKQELIKYCQKYRLDMKLIDPWIARFDTDKDNKISIEEFCRGFGLKVSEIRREKDELKKERDGKFPKLPPNIEIIAATMSKTKQYEICCQFKEYVDNTSRTGNDMREVANKMKSLLDNTYGRVWQVVLLTGSYWMNFSHEPFLSIQFKYNNYVCLAWRTPSQ
XM_002575378.1	Smp_040680	9e-140	1	1	cytoplasmic dynein light chain, putative	dynein light chain	HSGSKRLLKIMTPEHKAVVKNADMSDDMQQDAVDCAAQALEKYSVEKDIAAFIKKEFDKKYNPTWHCIVGRNFGSYVTHETKHFIYFYMGNVAILLFKSG
XM_002575063.1	Smp_037540.2	0.0	1	1	alpha-amylase, putative	amino acid transporter	MSSSGTNGRVPCDEEVGFLPTSKDSPDTNENEAGQKDTYRLLTREDLMQLDSREPLWLRLRWGLFILFWIVWIGLLLAAILIIVFTPKCPPRPVLPFWRSSTGYWVNPFAYADSTNDKIGDLRGLVERLEYIKSTIGAGFIVLTSIFSGQYTNDQKTLGLVDDFYNIDPAAGTMEDFKYFVRSCHKHGIHVVLTMDFNSVSAKHSWTDLTSMLEPYPSGGRISRLGGDAKTVIQGTEYYSVFGSQFVDLNLRESVTLDHISDVARFWLNEGIDGILLDNVAFYVENSAKPTASITKELGSKWFNEYPSSQIYLNESVDVVRRIRKVVNEVSESSGKPKLLAVDAGNTGYGISEKEDLSMQYLGTEDSPAAHVVVSRQFVKQRGWKAPPTNPSVTNNDIF…
XM_002574163.1	Smp_137170	0.0	1	1	plasma membrane calcium-transporting atpase, putative	Plasma membrane calcium ATPase	MRERLSAEDSNTPSANFGCSMRELQGLMQLRGAEAVEVVNKRFDGASGLCQRLKTSPTQGLSSHDLVRRREVFGTNIIPPTPPKSFFQLMWEALQDVTLIVLMVAAAVSLLLALYSKYFGGEHSSGDETEGEVSWIEGVAILCAVVVVVLVTATNDWQKERQFRGLQDKIESDHKMSVLRDGDITEVLVGDIVVGDICLVKYGDLLPADGVVLQSNDLKVDESSLTGEPDQVKKGENIDPMLLSGTHVMEGSGKMVVTAVGVNSQAGIIFTLLDKNKLAATGGRIENHQQDNLNQRNSLGSGDAEATEDGSDAPKGRKRRKKKYSVLQAKLTRLASLIGQLGTVVASLTVIILVVKFSVNTFYFNKEQWDTGRHLHQFVQFIIIGVTVLVVAVPEGLPL…
XM_002572660.1	Smp_012440	0.0	1	1	glucose transport protein, putative	SGTP1	MGVASNNGITGKLVLTVLITCVGSSFLIGYNLGVLNLPRRNIEIYFNETVVPNTPELDSSFFYTHVSTIFVVAAAIGAFSCGWVADGLGRRNGLILNNVIGIIGGVIVGPCVLVKQPALLYVGRFVIGINSGITIGIASLYLTEVAPRDLRGGIGACHQLAVTVGIAFSYFITFTFLLNTLNLWPLAVALGAVPAAISLVTLPFCPESPRFLYMKKHKEAEARKAFLQLNVKENVDTFIGELREEIEVAKNQPVFKFTQLFTQRDLRMPVLIACLIQVLQQLSGINAVITYSSLMLELAGIPDVYLQYCVFAIGVLNVIVTVVSLPLIERAGRRTLLLWPTVSLALSLLLLTIFVNLADSGPQSTKNAMGIISIILILIYICSFALGLGPVPALIVSEI…
XM_002571802.1	Smp_124240	0.0	1	0.99	sodium/potassium-dependent atpase beta subunit, putative	Na/K transporting ATPase beta subunit	MSMQEFSDNLSTLSYMSRRRIPTWIYDPKNKTLFGRTCCSWILCILFYLVYYACLATFFTCLLWLVLYCNAPENQPARTGAQSLLDFKPGLGFRPLLDVQKSLIRYSADDAQTYLPYTQNMDAYLDTYNQVNAKPDSQFANCKGKEGETKDVDKVCKFPLEVLGPCNTANNYGYGKGTPCVLLKVNKVFGWMPSIERPSQSNDILVSCSGQNSADEENIGSLAYYPSKNFSGKQYGVFSSAYYPYLGQAGYLGPIVAVEFKSPKKSVTILVKCTISNVLNANKDELNFEIMVD
XM_002572002.1	Smp_005740	0.0	1	1	aquaporin-3, putative	aquaporin	MVSCSEKYAHKQHIVADRLRLTSSPLVRACLGEFMGSIILMIFGSGVLAQVILGDHGKHAHGTFISVSLGWGFAVYMAVMFSGQCGSGHCNPAVTLAAAVVGKLPFRRIPFYTFFQILGAFLGSLVVFALYREKIIEYAKLNDNGALLLNTTGGIFVTNPSASHLTCFLDQVMGTALLTAGAFAITDPNGWKIPDYLHPLHLAFLVYAIVGCFALNAGAALNPARDLGPRLMIFIFGWGNKAFSGANYFFWIPIVGPYIGAVIGGILYEMTIGIHLDRKSDFVVDVDYDDSHRDGKKLVAYSSP
XM_002572924.1	Smp_130300	0.0	1	0.98	na /k atpase alpha subunit, putative	SNaK1 alpha subunit	MGVPNARGDNYRMATEKKSKKNPKKDDLNELKQELDMDEHRISLDELYSRLSTDPQSGLTAEQAKTRLERDGPNALTPPKTTPEWVKFCKTLFGGFSLLLWIGAVLCFIAFSIESGTHEDPPKDNLYLGIVLSVVVVVTGCFSYYQESKSSRIMESFKKMIPQTALVIRGGVKIEAPAEALVVGDLIDVKCGDRVPADIRIISASSFKVDNSALTGESEPQSRTSEYTNENPLETKNLAFFSTNAVDGTCRGIVVSTGDRTVMGRIANLASGLQIGQTPINKEINHFIHLITSVAVFLGVSFFVIAFILGYHWLEAVIFLIGIIVANVPEGLLATVTVCLTLTAKRMASKNCLVKNLEAVETLGSTSTICSDKTGTLTQNRMTIAHMWFDNKIFDADTT…
XM_002575574.1	Smp_145290	0.0	0.99	1	alkaline phosphatase, putative	alkaline phosphatase	MLPNVLSTAPKPLLFFIAVILSLYKIECKSSSLNVADPGTWKRLADERFDKFEQSSSHLLLKRPENVILFIGDGMSLSTVTGARYLKAEKMDLLGGDVQLVWENWPVASLVRTFNSDRLTTDSGSAATAFMSGVKSPHKTVGITGTVKCCKCTELKELERAKSSIMYASKAGFSTGIVTTARVTHATPAAAYANMLHRDWESKAPSNEHGFHCTDAATQLLSNASHVNVIMGGGATEFYGPSDSTIFNMKGKRSDSRNLLHKWKAIQTKMNRKHVLLHTNSEFKRTNWSSVDYVLGLFAPSHLAYRLENQDQPSLAEMTEAAIKVLSRNPKGFLLLVEGGRIDHGNHENRAHFPLHETFVEVVQLMYIRHDIQFHKGFDEYRNVVKWIRIMERDFLILP…
XM_002574210.1	Smp_137410	0.0	1	1	calpain C (C02 family)	calpain	MRTARHNTRAMLFDPERSPLSSKVTENNYCRASPSPVVNRPSTVFSPVGGPSSSFEKIRQDLLNSGHLFCDSAFPADDSSLYYSQRPPCQIVWMRPSEIVAANSGGGSMGITPRKISTPEFIGEGGIKLGELRQGELGDCWVVAALAAIASQPSLLSRTIPTGQSFRVEWYAGIFAFRFWRFGRWEEVYIDDRLPVKSGGQPLFVHSGRSTEFWPTLLEKAYAKLNGSYEALNVGLVGDAMDDLTGGLTESYTLPGAEDHGLQPPADLDDILIKSFDRRSLITARFVIPVGFVPGQAFGLTDCRKLRLTDASGSRLLRLVRLRNLWPSVRVDWTGAWSEGSTEWLSLPPQDRLKVGLVKAQEEFWMSLEDFIANFDYLDICHLTEPPPVISKSSSAYHS…
XM_002577044.1	Smp_153390.2	0.0	1	1	ectonucleotide pyrophosphatase/phosphodiesterase, putative	phosphodiesterase	MYCIETMQKMIILLLICFFPYIERIYASGVVGKEQFSKVILISLDGFRYDYFDMAKQRNINMSAFDKIINQGVYIRRIENEFPTLTFPSHFSIVTGLHPGSHGIVDNVFYDPIINATFSSRNQSTATDSRFYDVGAEPIWVTNQFHGHKSGVTFWIGSEAIIKGERPTHYLTPYNESITFTQRIDILMDWFEHENINLGLMYYHQPDRAGHIHGAASDEVFKAIEEINHGLEYLLTSIEMRPSLSCCLNLIITSDHGMTNISSDRVIYLHDYIHPNEYISAPKKSAEIWTLWPKQGYTVRSLYNKLKDRHFRLNVYLKEELPTRFFYGSSDRVGPVVVYADIGWTIIADRTSGITLKNKGAHGYDPDYKEMSPFLMAMGPQIAKSQPTELKESIKLIDI…
XM_002575502.1	Smp_042020	0.0	1	1	ATP-diphosphohydrolase 1, putative	Ecto-ATP diphosphohydrolase	MVFGKRNLSQLFDFTKLVTISNISLTPRRIMERNTNLHKILTILALIILVISFIGLLIIIVLYILSSNIPDVYSVVIDAGSTSSKLHLYKWIDEPFRSNGKVDEVTNEKLSPGISDYINDTIKAYDTLKPKLLKLTNSLTFEQKQHTPIYLAATAGMRLKLIEDPLGSLDLFSVIRQYLKQSGFQIETPNERIRLLYGSEEGLYGWVSVNYILGIIKEGKQTNPSDTVGSLDLGGASTQIAFIPKVYSNIPKEKLDFYPLRLYGNDFSVYSHSFLCYGKSEFERRVITSIAAASLLQSKIPNPCFLQGYKSDLYNAFEWFSGSCLSGTYVKKTFAEEIFRPPNMNSFSFNGTGQPNECVNYILKHFQTKCDHSSCSFNNVFQPAPFGKFMAYSGFSYVM…
XM_002574069.1	Smp_136640	0.0	1	0.99	programmed cell death protein, putative	sorcin	LLNMQQPGVNSVAANVFNQIDRNRSGSICASELQQALSNGLGTSFNIKTIELMICMFDKDMNGTINICEFSQLFEYVQQWQQCFRSYDRDRSGTIDCREFHTALTSFGYRLSPDFSQFLVRKFDKQRRGSVGFDNFILACVCLKNLTDVFRPYDYQRNGMAQLSYEQFLTAAFSVVS
XM_002574890.1	Smp_141010	0.0	1	0.99	fer-1-related	dysferlin	MDFDKVTPDNVLSATVKVPICVVLQNKKGQDTMSTIELSLRYEFPQTTKGLTSNEIEQGSVSDKVDAGGAVDVGLRGSGGTGTDVNEKDILDDQAGAGKRIKKLGGLAVRPQYSTKKQDFQIRVKVIEARQLQGANISPICKITCWKESKDTRVRNCTNSPFWDQTFFFNFFDSAAEMLDQQLVFTVYDSRRLRRDSLIGSFKFDLSIVYECDRHAMLNKWLLLCNPEDPMSGAKGYLKISVVILGPGDEAPIMKVGESDEKEDIEGNLLRPAGVQLRPAIFKILLYMAEDLPRMDSDAFKGIKNLLTTSDEEKEFVDPYALVSFAGKSIKSSTKYGTDHPEWNEEITMNIQFPSMCEKLKFTFFDWDRIGYNDPIGTGVISISQISAFRDDNDGFLPT…
XM_002579497.1	Smp_194960	0.0	0.95	0.99	similar to tetraspanin TE736	tetraspanin A	MKLSLNEQGWNRLFIILNGTFLVYSLVLCGLSIKVQDDLSQFNEILQRISPSIIPVIIFTGLIGIIAAITGYCKILKQNQIITILHIISLAIATVTELCIAIGTIMTPNEFYTKANSSLQNSLHYYEQHPVYTEQFNHLQENYKCCGSLLFTDYRRTNNSLPVSCKDDKFIYAV
XM_002579498.1	Smp_194970	1e-129	0.85	1	similar to tetraspanin TE736	tetraspanin B	QIEVVTKRLVTKSLKTQLHNMFLSQLQKYWNNIFIISNLLFIVFDIALLALPIRTLDVLANYNTILDYFKPVIFPVVIFTGILGLLSVFIGFIGLWKKKTVFILV
M34453.1	Smp_017430	0.0	1	0.99	Sm23, putative	Sm23	MATLGTGMRCLKSCVFVLNIICLLCSLVLIGAGAYVEVKFSQYGDNLHKVWQAAPIAIIVVGVIILIVSFLGCCGAIKENVCMLYMYAFFLVVLLIAELAAAIVAVVYKDRIDSEIDALMTGALDKPTKEITEFMNLIQSSFHCCGAKGPDDYRGNVPASCKEENLTYTEGCVSVFGAFLKRNLVIVACVAFGVCFFQLLSIVIACCLGRQIKEYENV
XM_002578899.1	Smp_077720	0.0	1	1	annexin, putative	annexin	MISHQTGPSITFPDRISAENDAEQLHNACKGLSTDEETITKILGHRNLQQRYQIRETFHRRYKKDLVHVLCSSTKGDYESLIKTLFRGSIQILAHDLYKGLKKPDIVNEIICCCNNHEIMMLKKAYQEVLQEEEPKKASQRTLESDIIKETKPPYEQLLVALLQARRDEDPPELVEEAIRTRSTSRLVSRSQVDKDVEDLYYAGEKRAGKGDSDTFIKILTKRSKYHVKEIWDLYLAKYHNTIVEVISKKFSEPFRSGLNTMIMALMDLRLLLVCQLYDSMYGLGTREDTLIRITCLRCEVDMNTLKSMYREYFGKPLIEAVREDTSGDFRKLLLALLGE
XM_002576282.1	Smp_050270	0.0	1	0.97	tyrosinase precursor	tyrosinase	MIKTITFLYCIFILFNQFINIYGMIPEQCGYNLTRRIPVCCPISNINGEVCGGPKYGKCIQIWTPREKIPSVFLIDDRIDWPKRYFTYFCQCYGNYFGSACDECWFGWKGRYCNKRSVRIRRDIRTLSNKELHIFKTVIVLSQTWPSGYLLVDESNNWYVDPLREPRLEHASVQYYITYLHRYGSRSTLYKNVKDCEDYGILNFNHDGVCFPTWHRYYGLLWERLMSKIAMKVFGITDFATPYWDWTGLTYCDICTNRYIGAPGRLSDLGRHISSRSPFSNLTEFCYEPIKDMLCSGCQKSRKRLTITREFKKGNLPDVEDLKYVLSLSQYYVPGERLSPVCRSFNIALEGFCGRPGADPNSRWFHNKLHVLVDGSMCCTGTASNDPLFILHHTFIDKI…
XM_002578361.1	Smp_072190	0.0	1	1	Sm29, putative	Sm29	MKSGWEYIGIFLYIMVNILDKQRCHSVRCYVCDYCPIVTSVSISEENNCTSCSTAGYNYSIHRICVFKDGIPINFPNENRTQCNTDLCNGLTVDNTGKIPSVPIANPFRCYTCLNCTKSNQKVLSGCGACVTTRGSGIISKFCGTTCERLYIDDQISCCSTDLCNGMTKLSIHRHVIIVLFVCIGISKYIL
XM_002569560.1	Smp_131910				Sm200	Sm200	MYFLQLFLFLFTSVCNTLSDLHSNNVVDIKAHDYKLLTKILAARQLQDLFDNDKNTHGLFHAELNQKVYLIVDLGGLYQVSSVEITSDEPENLKQTISIGYGFDKNTTSLFGSLYNCTYQQTSTLCIPACSQYDNSRTGFVGNSLLWSFQSDKEGWTRIYDLIIRGTPFDENRSMKNNLDDITLFKPYVDHLVPAESMESCNGLLWHLNDESSVTESSALAATDDRNVTIYFGKTYSVTSVHFVTSKRDDMPQEYTLHFNGMESLTKIINLQNDCTLTASSDNDGANFKEYNCPTTDLESYTFDYVTVNVKGLYKLHVYGLPFHYPKIQIIPSKEDDKTIMVDKNVLQISCIAQSCNSTSNVLLDVDDSYRRSRSSDKSCPMNGHIVRCEYLNLFRLST…
XM_002580961.1	Smp_101970	1e-179	1	1	Placenta-specificprotein 8 protein (C15 protein) (Onzin), putative	unknown	MDIQDVFEDLMISSSSYPTEVVDLTNSDTDTKPLSPAAIRRLSREKNKNTPKILDEINSCCKDMGEKDVPDDEDFDIEDESIMERLIGLLEMFPEPVRRGISSAYSAASEGIVSGYSLSRSVTWFLVSTTTICFLPLILELERVQTEEQEAVQQRAMMLGPRAAGGSSGLAGFSAAVPHLTHIEPK
XM_002575931.1	Smp_147140	0.0	1	0.99	transient receptor potential cation channel, putative	unknown	MGRKRHTVGSVFRNRSDKSSRSSGTSSSSSSSSSKSSIKPIPWIEQNIVCLECAKFVFARHSKSNPCCSCGLTFSEHPSNVQIEALTQQNLNLQPDISNTGDYHLKPTNNEHWHVKTHTQEIPTNAYGTVEFQGGPHPTKARYVRLHCETCPEVVLHLLLHEWKIRVPNLVISIVGGLANAPLQAKLQQVVQHGILRAAKTTGAWIVTNGLDIGVTRHIGEALKDEVHIRGSNIVALGIAPWGYVQHRETLIGLDVCVYSPGRQEAPLNPDHNYFLLADNGTSGKFGGELGLRRRLEQYLAQQPIDMRRYGGSKSRVPIVGVLLEGGTQTFRTVFELVTGRNPVPIVVCDGSGRAADLLAFMHRYANEDGDLSTQLRDQMVANISRAFQIRRFEAEGLY…
XM_002574495.1	Smp_030920.1	0.0	1	1	mitochondrial import receptor subunit tom22, putative	unknown	MDIQDVFEDLMISSSSYPTEVVDLTNSDTDTKPLSPAAIRRLSREKNKNTPKILDEINSCCKDMGEKDVPDDEDFDIEDESIMERLIGLLEMFPEPVRRGISSAYSAASEGIVSGYSLSRSVTWFLVSTTTICFLPLILELERVQTEEQEAVQQRAMMLGPRAAGGSSGLAGFSAAVPHLTHIEPK
XM_002576737.1	Smp_151480	0.0	1	1	hypothetical protein	unknown	MSRLIWPYYTCTFFRRQPQYGLKSWYRYFIPDSYASVGIWNSRLSNNIFRSISVRDHGLEILRKINSGKIVSPLDYDIFANKLDELDVMSLDFVEEVIMSYMNTQAAVDVRDSTSHAFIRGYLNFREVDRLLKLIESRSKTGIFVDFASAVLMMDVFLRNGEWNSAVAVSWELCLQEYFSLENVRPLVFAASLFSCIKSIEHDSFLVKESQPEDDKEIEQKLVPYVRNPNYDNFFDIKRPKLKTGYTLLHLSHVLNSRCSLFQTTPVWNSLSKHVDSFRLMMRIFGLALSEQCDKLLVEIRKVDESAIQLGGLDPTVVKKLIRIVDTCETRSDDSSLKPGEPQVPSVSDVKSVQNELLRIQGGPQCTTQNFFKVVEEFVFNGVINNSDCMKQELEAVSD…
XM_002574690.1	Smp_139970	2e-111	1	1	Calmodulin-3 (CaM-3), putative	unknown	MEELDVKEMFCMIDKKQRGRITCKQLRSFLRKHDAKFSRRSVRNYVKSIDSDGDGKLTLDDLIRALTKCDHSK
XM_002571393.1	Smp_121950	0.0	1	1	hypothetical protein	unknown	MHTEDYSQRERRYSYYENSGVKPSTKIVKAGSFNCTDSLSYENGSSDWNSSNYRHFPRFKPSNEKIENGKQSESLSINRNISPVAIASSTPKLNHKIPTVMNITNSSVVTGNSFEVSADGMNNSSITQNNPFSPRNATPTAETSAIDDSPSMMRSDAISPSKFRTIQTPSKEVTGNNQYKTKPDKYLKSSNIVIVHAEDSTSNYNDIYPRFTESLMHSYKNHNVADSPQMNNRKHIQLVYAKPSKLRRDIMAHNNNEKVSPVKMSNAPVTHAAPTGTKTTYSFNDHFIIKKPDLSEIPEQKLAILSNQFGELSDSVERVIIRIFDSAVVPGGALRGVVYICLKEPIKLNTLTVTTEMITKTISSDEKQDMEKRIPISYTVLTDDPSLGKRMPIRKFTCQ…
XM_002572263.1	Smp_008310	0.0	1	1	succinate dehydrogenase, putative	unknown	MSFSPRLCCLRNLTGFSEFFGPVSKVSVGLLRPSSIVRTSKAAKGSTSEKVRRQAEKEMQSFWDRNATEKRPWSPHLQVYSSPLVMRFSFLHRATGIAMAIVWSSVGIGAFFFTGHYDSILDYVRNMHLGTSVIAACKFILCYPLVYHYLNGMRHLAWDYAIGFPIKTCNTTGFIALGSSLVISAILACIRL
XM_002574703.1	Smp_140000	0.0	1	0.99	tetraspanin-CD63 receptor , putative	similar to TSP-1 (26%), TSP-2 (22%) and Sm23 (28%)	MLCNLPCRIVLIVMNTVSMIVGLVLLILGALMVWGQSVIQSLLNNFITNLINQYIKGTDSGQINEMVTRILTSTSPVGMAVFILGAVCTGISLFGYCGACCNMKILLYIYAILVGALTLAFLITFSVYFSRKDEIGNRAIDLFETSVKNYQSMAANTIDSLVVGLISPPLQCCGVNNGDDFTTSPNFWRNDTYGGKTYNNIAYPVVCCKLNQNYAIIDSTCPDQFNENNSNYKTGCRGPLKELFLKYMDFVAYGLIAAFVILLLVVIFTLLTIYIDVI
XM_002575042.1	Smp_194920	0.0	1	1	T-cell immunomodulatory protein	similar to T-cell immunomodulatory protein	DLSNHPVNFNILLHTAIKLIRIPSFIMLAELYLLLLFSLVNSDKNIILNNNPSDFYQQLNAWPDFQLAAFTDLNADRRMDIIFANGDGSKLFAVLQSDNKGFQSTSSILSSVKFSPPVEIIGNVLPKPVRGVATSDFNGDSRIDLLLVTGSSDGGPFDVYVAYGLSGENRGKFDSPKFLDTFTSQPLVCDLNSDMIADVYGEVSGHRVAYIGGNKLTKLSATYSGPSWSRLGYSAFGDINGDGVPDIVILVDNENRQQLQVILRTQSSIGSLPDVANAELIDLDPKLLSTPQSVLGLFVLNDFDYDGLIDLLLPVCRDAKCLDTSSINMYSFRDRKWSPVNVIWEPSNVKENTMRWSLTSTPQIKSGLLTSSLIGPAVGDVNMDGKPDLGLGVTSWSEN…
XM_002575909.1	Smp_046290	0.0	1	1	marvel-containing potential lipid raft- associated protein, putative	Domain: Membrane-associating domain. MARVEL domain-containing proteins are often found in lipid-associating proteins - such as Occludin and MAL family proteins. It may be part of the machinery of membrane apposition events, such as transport vesicle biogenesis	MDRAPAAYETTYETRYETTDVSSVINVGFVRSLSGILKLCQILLSCIVLICVAATSYWSIHSSGGWVNFVAATTLICAAVFYIFYLFNLIRKLPGPWIIIEFSVLLICTFFWFITLIVAAAHHSKGAGAIAAAVFSAIALAVYITELATRFRCERRGNGFIITMTGVMTTHATHGPPTFAQPAPGHMQAESVDPHIGFSGAYAPGERADEGYIMP
XM_002574939.1	Smp_141680	0.0	1	1	hypothetical protein	unknown	MKILMDFINKMLKNFSLIYFILLSSLLIKGQSINDNNLWQVITSYPNATKFADFIQEIGLQSSLEKPGCLGDDECLTIILPTNDAIDLMANDLAWYSLGDYQKHSFIHGHIIQRGITTGQSSVRVTTREWTKLGQQMNFIDIGFGTGVKYTTLFAKQRFGFSTIADSTPLYFVNNAKIMTPDIMASNGIIQIVNRVLYTPHISLPFMEFLQKQGNLGISKELWYLLLQEPKYALYPAQQIYSTIFVVSDSGWNSLPITQLNRLRKNITLLASVLSYHYCPNQLIYREWISVKPNMNIYTGFPNRPQSASSIQPSELNSAQLYKSSGDSIIISSGNTEAKLEDKSFIIQKAIVHIIQKPLAFIFETREEILNRINSNLLYSCQLDTICKNILTSSTDITI…
XM_002578678.1	Smp_075420	0.0	1	1	hypothetical protein	unknown	MRNKEIMSYQQEHDYIDDCLRHVGSKQHLFYETHVCTIYRINAGPAEHFSETRALYLLQKYRRKRQSHCTGSLLEDRISFERNKASGKIPFRPWVLYKEVKEIYMNRNNPHFFVLCIDSMYSSMRYYEIYKCKIPETAQTVCEYIRRAMNDTDKVLRDLTSIRQVYVDDVGRVRSVSNFEIENNRATISTQETNQNDYARNTISPVYIPSPVMVSPVKQSYNPPHTASIKRRTIDSLLDVTYLTYDPHRGLITNKYGPVYLYLYRPKSQGTLGNNSIYSDRRSTYSYGNDDHHRNSPYRY
XM_002571418.1	Smp_000100	0.0	0.9	1	filamin	filamin	MDYPDPDAGYVDEDEEEIPMAERELAEDAEWKLIQKNTFTRWANEHLKPKNVTVDDLQFDLADGLRLIALVESLSGQQFKHVNRKPSFRTQKLENVTMVLRFLEENEGLRLVNIDSSDIVDCRSKLILGLIWTLILHYSITIPLWEGEPDFGAQGPTPKQRLLSWLNNKLADRPVKNFTTDWNDGIAIGALVDACAPGLCPDWREWEPKQNLRNAREAMGAAEQWLDVPQLIHPEEMTNPRVDEKAMMTYLSQFPSAKLKDGAPLRPKSNPGLVRAYGPGLEPHGNTVGNPARFTIDTFSAGRGAVEVIVLNPKGQREPCDVLSNNDKQQTYSCAYVPTQEGEYRVIIKFATKEILNSPFKVMVEGAQGDGSKATASGPGIEPTGNQVGRRTFFNIFTA…
XM_002580513.1	Smp_096760	0.0	1	1	phosphoglycerate mutase	phosphoglycerate mutase	MAPYRIVFIRHGESVYNEENRFCGWHDADLSGQGITEAKQAGQLLRQNHFTFDIAYTSVLKRAIKTLNFVLDELDLNWIPVTKTWRLNERMYGALQGLNKSETAAKHGEEQVKIWRRAYDIPPPPVDISDPRFPGNEPKYALLDSSCIPRTECLKDTVQRVLPFWFDTISASIKRREQVLIVAHGNSLRALIKYLDNTSDSDIVELNIPTGIPLVYELDANLKPTKHYYLADEATVAAAIARVANQGKKK
XM_002571709.1	Smp_002880.1	0.0	1	1	ATP synthase alpha subunit mitochondrial, putative	ATP synthase alpha subunit mitochondrial	MSSFRAAGLVLRQLSNKNPCVFKQLGCRWLSTSSTLKAGAPEFSSILEERILGQTLQTNLEETGRVLSIGDGIARVYGLKNIQAEEMVEFSSGLKGMALNLEPDNVGVVVFGNDKLIREGDIVKRAGAIVDVPVGVELLGRVVDALGNPIDGAGAINTKTRQRVGVKAPGIIPRISVREPMQTGIKAVDSLVPIGRGQRELIIGDRQTGKTAIAVDTIINQKRFNDAADEKKKLYCIYVAIGQKRSTVAQLVKRLTDADAIKYTIIVSATASDAAPLQYLAPYAGCAMGEYFRDNGKHALIIYDDLSKQAVAYRQMSLLLRRPPGREAYPGDVFYLHSRLLERAAKMNDSYGGGSLTALPVIETQAGDVSAYIPTNVISITDGQIFLETELFHKSIRPA…
XM_002571767.1	Smp_124050.4	0.0	1	1	venom allergen-like protein 6 [Schistosoma mansoni]		MINERFNDQAIREHNRLRSLHGCPELQLDEDLMISAQKWAENLAAAEKLYHSNYNDYGENLAFKMSASPCQITGEEVSQTWYSEIDYHDFTQSYHPNSRHFTQMIWKSTTRAGFGLAFSQDQTKAYVVGRYLPVGNKGDFGWNVPHYQGIKRSGDNESRCTGDGGSTKLNDTGSANNDTSRESMYSLDRNSIRSSHRRSFRESLGLSERCKCYWDHTPYAPEGHSLINEDERSRTGSIRSGDFQRSRPTSFSNNDDIHYKSVYTKSSEDLRPKTINVTTTSLPNTDDAHNSLCSPTVINLNFMNSDERPTIVTNTKPSDDFSGSSRMSIRTSVRRPTRSSTPVCNGHSYERESSISSNGRANYLKDDQYGRASYIRNDQSGRSSYMKDEQYGNANDDNS…
